# Supplementary material for: Facile Synthesis of Pyrrolyl-Containing Semisquaraines in Water as Precursors for Non-Symmetric Squaraines
Source: MDPI journal article supplement (doi:10.3390/compounds3010002), 2022-12-28
Supplement: s1 [file s1]

Archive with 1 entries (1 files):
- compounds-2102843-SI.pdf
