# Supplementary material for: Facile Synthesis of Pyrrolyl-Containing Semisquaraines in Water as Precursors for Non-Symmetric Squaraines
Source: MDPI journal article supplement (doi:10.3390/compounds3010002), 2022-12-28
Supplement: s1 [file s1 › compounds-2102843-SI.pdf]

## SUPPORTING INFORMATION

### Facile synthesis of pyrrolyl-containing semisquaraines in water as precursors for non-symmetric squaraines

Daniel D. Ta, Jeanne M. Favret and Sergei V. Dzyuba\*

Department of Chemistry and Biochemistry, Texas Christian University, Fort Worth TX  
76129, USA; E-mail: s.dzyuba@tcu.edu

#### TABLE OF CONTENT

|                                                                                                              |    |
|--------------------------------------------------------------------------------------------------------------|----|
| Materials and Methods.....                                                                                   | 2  |
| Figure S1. $^1\text{H}/^{13}\text{C}$ NMR spectra of authentic and recovered squaric acid samples.....       | 3  |
| Figure S2. $^1\text{H}$ NMR spectrum of isolated <b>2a</b> and <b>2b</b> mixture.....                        | 4  |
| Scheme S1. Attempted synthesis of non-symmetric squaraines using squaric acids monoamines as precursors..... | 5  |
| Table S1. Costs of substituted pyrroles.....                                                                 | 6  |
| Table S2. Synthesis of <b>4a</b> : optimization studies.....                                                 | 7  |
| Table S3. Synthesis of non-symmetric squaraines; optimization studies.....                                   | 8  |
| Table S4. Photophysical properties of non-symmetric squaraines.....                                          | 9  |
| Synthesis and characterization of pyrrolyl-containing semisquaraines <b>1a</b> and <b>4a</b> .....           | 10 |
| Synthesis and characterization of non-symmetric squaraines <b>6-18</b> .....                                 | 11 |
| Green chemistry considerations, metrics and calculations.....                                                | 16 |
| General considerations.....                                                                                  | 16 |
| How synthesis of <b>1a</b> relates to 12 principles of green chemistry.....                                  | 17 |
| E-factor.....                                                                                                | 18 |
| Atom Economy.....                                                                                            | 19 |
| Mass Intensity.....                                                                                          | 21 |
| Process Mass Intensity.....                                                                                  | 23 |
| UV-Vis and emission spectra of non-symmetric squaraines.....                                                 | 25 |
| $^1\text{H}$ and $^{13}\text{C}$ NMR spectra of synthesized compounds.....                                   | 30 |
| References.....                                                                                              | 46 |

## MATERIALS AND METHODS

All reagents and solvents were purchased from the commercial sources (Sigma-Aldrich, Acros, and TCI) and were used as received. NMR spectra were acquired on a Bruker Ascend 400 (400 MHz) spectrophotometer using DMSO-d<sub>6</sub> as the solvent, and the chemical shifts are reported in ppm ( $\delta$ ) from the residual DMSO peak (2.51 ppm) or TMS (0.00 ppm). For the acquisition of the <sup>13</sup>C NMR spectra, D1 parameter was adjusted from 2.00 to 0.25 to better observe resonance of carbons that are associated with the squaraine core. For squaraines that showed low solubility in DMSO-d<sub>6</sub>, <sup>13</sup>C NMR spectra were acquired either: a) in CF<sub>3</sub>CO<sub>2</sub>H using DMSO-d<sub>6</sub> as external standard (in the NMR description indicated as: CF<sub>3</sub>CO<sub>2</sub>H w/DMSO-d<sub>6</sub> as external standard) or b) a drop of CF<sub>3</sub>CO<sub>2</sub>H was added to the NMR tube that contained the squaraine solution in DMSO-d<sub>6</sub> prior to acquisition of the <sup>13</sup>C NMR spectrum (in the NMR description indicated as: DMSO-d<sub>6</sub>/CF<sub>3</sub>CO<sub>2</sub>H). Multiplicities are reported as: s – singlet, bs – broad singlet, d – doublet, dd – doublet of doublets, ddd – doublet of doublet of doublets, t – triplet, q – quartet, p – pentet, sext – sextet, m – multiplet.

High-resolution mass spectra (HRMS-ESI) were acquired on an Agilent 6230 instrument at the Mass Spectrometry Facility, Louisiana State University.

Microwave facilitated reactions were conducted in CEM Discover or Discover-SP microwave synthesizers using 10 mL vials.

For spectroscopic measurements stock solutions of non-symmetric squaraine dyes were prepared in dimethyl sulfoxide (DMSO, 1 mM solution), and used within 48 hours. The UV-Vis absorption spectra were measured with a Cary 60 UV-Vis spectrophotometer (Agilent Technologies), with a resolution of 1 nm using 1 cm quartz cell. The fluorescence spectra were measured with a Cary Eclipse fluorescence spectrometer (Varian Inc.) using 1 cm quartz cell with a resolution of 2 nm. Fluorescence measurements were carried out as follows: excitation and emission width slits were 5 nm and 5 nm; samples were excited at the wavelength 20-40 nm below the absorption maxima; PMT detection voltage set to high.

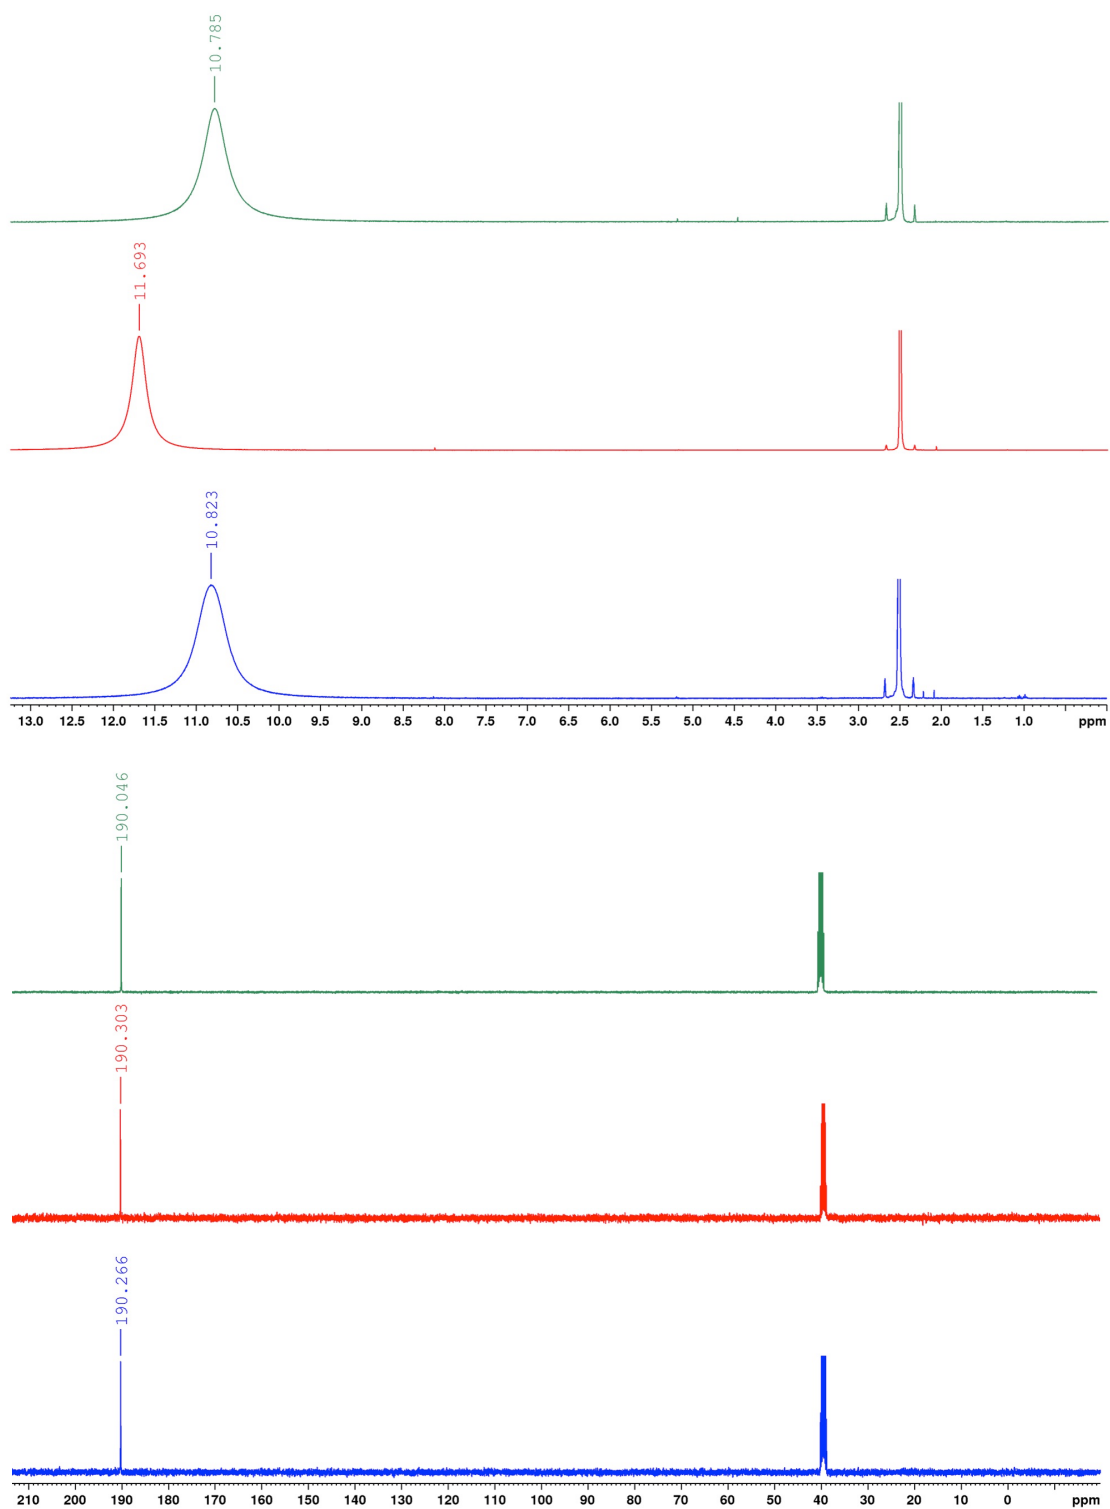

**Figure S1.**  $^1\text{H}$  NMR (top) and  $^{13}\text{C}$  NMR (bottom) of recovered and authentic squaric acid samples in DMSO- $d_6$ .

**Blue:** recovered squaric acid without charcoal treatment; **Red:** recovered squaric acid after charcoal treatment; **Green:** authentic squaric acid sample.

All samples showed the same decomposition point of  $>300\text{ }^\circ\text{C}$ .

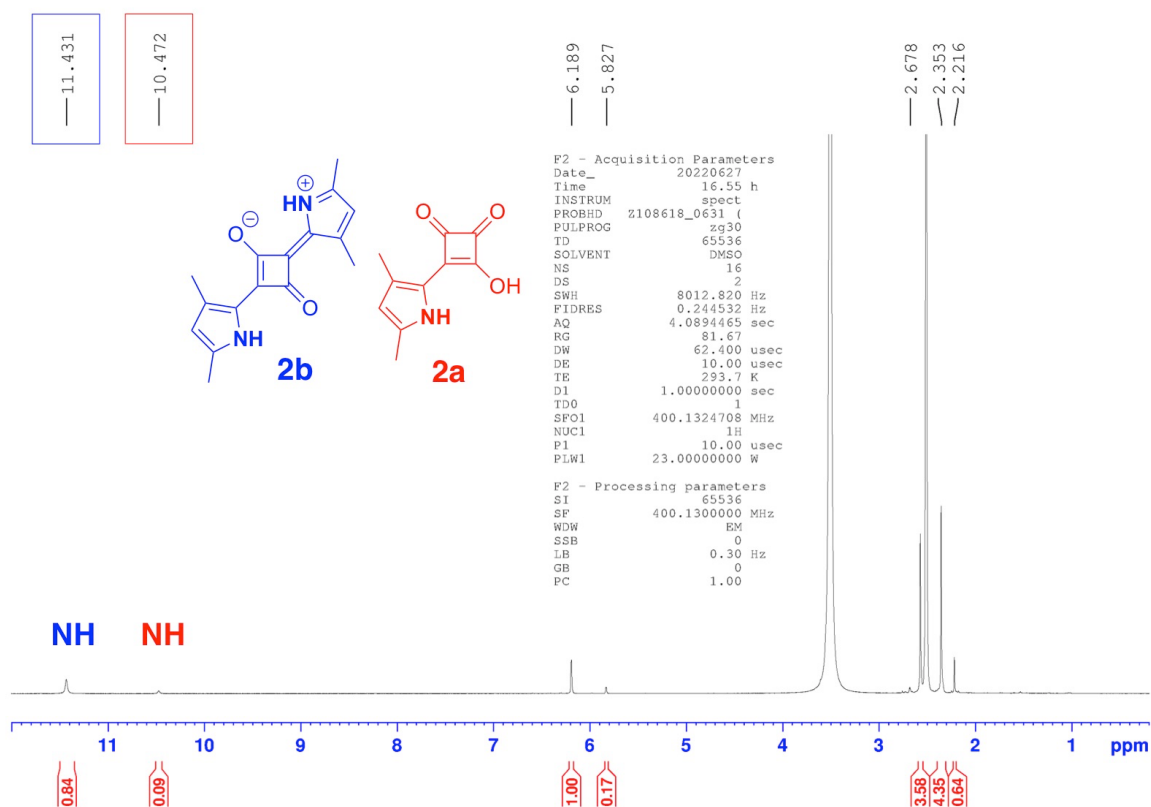

**Figure S2.**  $^1\text{H}$  NMR (400 MHz, DMSO- $d_6$ ) of the mixture **2a** and **2b**. See Scheme 3B and related text for details.

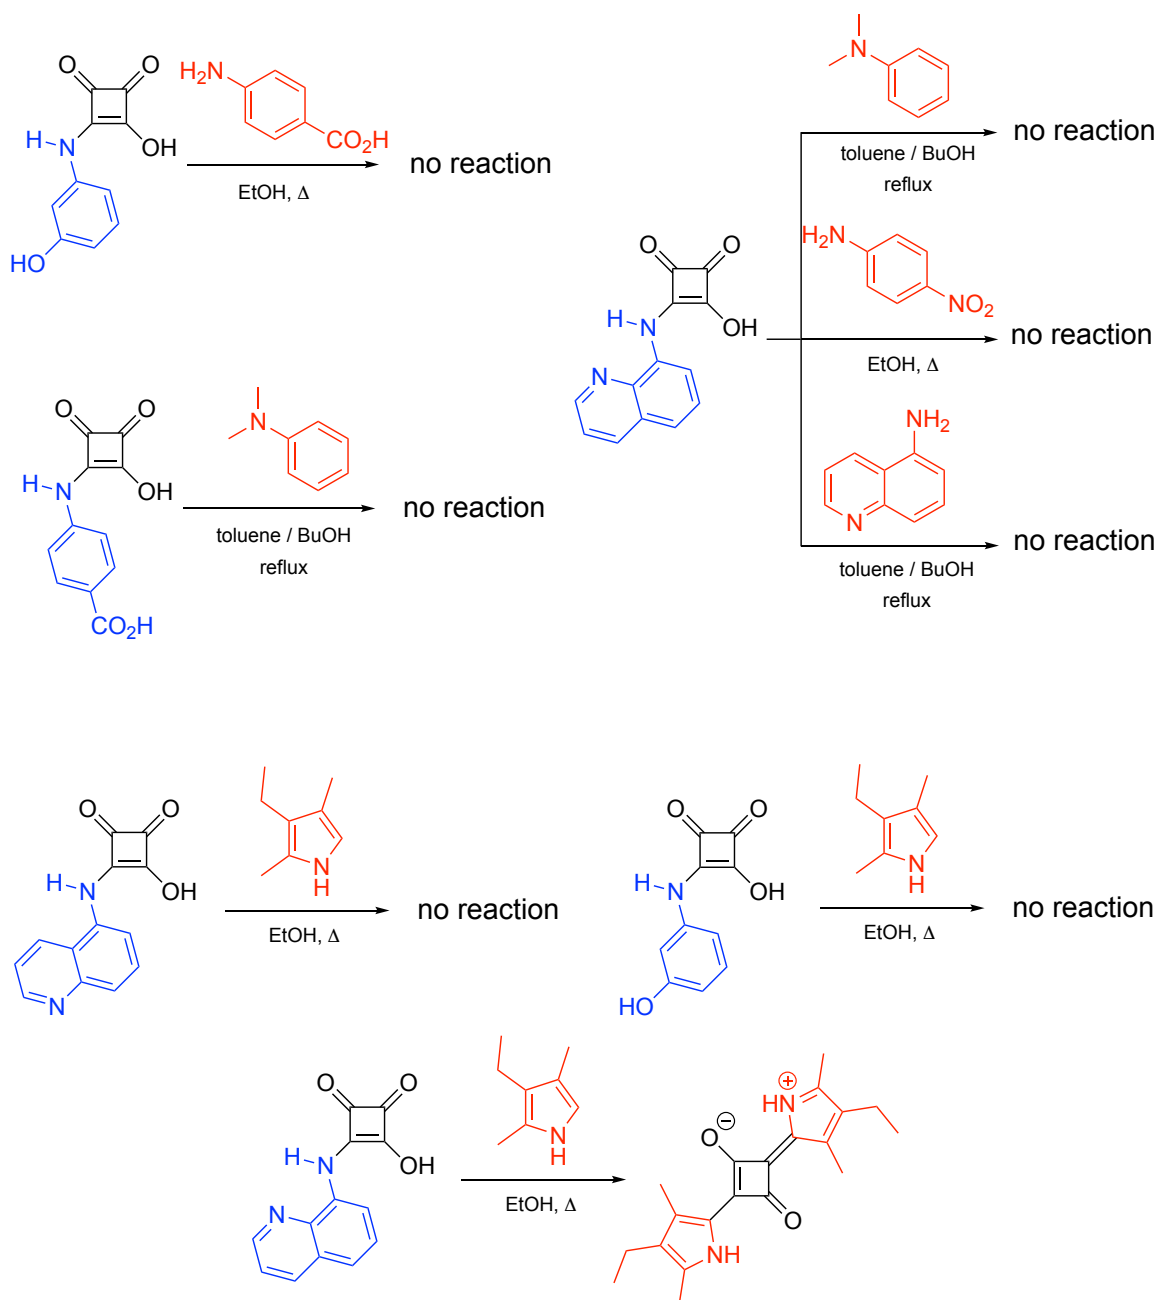

**Scheme S1.** Attempted syntheses of non-symmetric squaraines using squaric acids monoamines as precursors.

“No reaction” means starting semisquaraine was recovered.

**Table S1.** Cost of alkyl substituted pyrroles used in this work.<sup>a</sup>

| pyrrole                     | Catalog #          | quantity | unit price/ \$ | price: \$/mol |
|-----------------------------|--------------------|----------|----------------|---------------|
| 3-ethyl-2,4-dimethylpyrrole | Acros<br>116210250 | 25g      | 379.00         | 1,868         |
| 2,4-dimethylpyrrole         | TCI E1075          | 25g      | 400.00         | 1,522         |
| 2-ethylpyrrole              | TCI E0713          | 5g       | 183.00         | 3,452         |
| 2,5-dimethylpyrrole         | TCI D0260          | 25ml     | 105.00         | 427           |
| 1,2,5-trimethylpyrrole      | TCI T1939          | 25ml     | 132.00         | 714           |

<sup>a</sup> – largest quantity available for sale was considered. Vendors' websites (Acros and TCI-America) accessed September 2022.

**Table S2.** Synthesis of **4a**: optimization studies.<sup>a</sup>

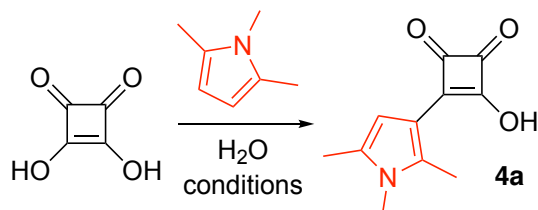

| Entry                 | Squaric acid / eq. | Time / min | Temperature | Yield / % |
|-----------------------|--------------------|------------|-------------|-----------|
| 1                     | 5                  | 15         | reflux      | 51        |
| 2                     | 1.5                | 15         | reflux      | 76        |
| 3                     | 1                  | 5          | reflux      | 14        |
| 4                     | 1                  | 5          | 70          | 14        |
| 5                     | 1                  | 5          | 80          | 45        |
| 6                     | 1                  | 15         | 80          | 50        |
| 7                     | 1                  | 30         | 80          | 60        |
| <b>8</b>              | <b>1</b>           | <b>60</b>  | <b>80</b>   | <b>79</b> |
| <b>9<sup>b</sup></b>  | <b>1</b>           | <b>60</b>  | <b>80</b>   | <b>84</b> |
| <b>10<sup>c</sup></b> | <b>1</b>           | <b>60</b>  | <b>80</b>   | <b>77</b> |
| 11                    | 1                  | 150        | r.t.        | 50        |

<sup>a</sup> – 1,2,5-trimethylpyrrole 1.5 mmol scale, [pyrrole] = 0.37 M; <sup>b</sup> – 1 mL (1,2,5-trimethylpyrrole: 0.81 g, 9.1 mmol) scale; <sup>c</sup> – 5 mL (1,2,5-trimethylpyrrole: 4.05 g, 45.5 mmol) scale.

**Table S3.** Synthesis of non-symmetric squaraines; optimization studies.<sup>a</sup>

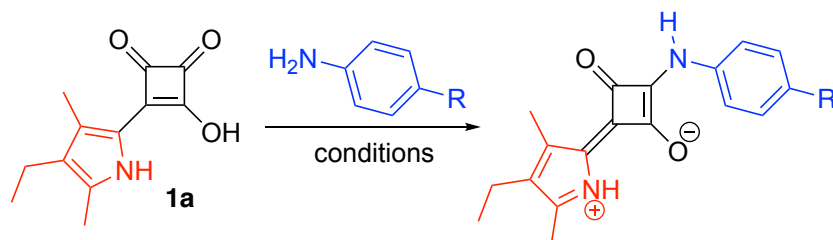

| Entry | R / eq.               | Time / min | Solvent          | Heating <sup>b</sup> | Yield / % |
|-------|-----------------------|------------|------------------|----------------------|-----------|
| 1     | CH <sub>3</sub> / 1.0 | 160        | H <sub>2</sub> O | conventional         | 55        |
| 2     | CH <sub>3</sub> / 1.1 | 950        | H <sub>2</sub> O | conventional         | 83        |
| 3     | CH <sub>3</sub> / 1.0 | 5          | H <sub>2</sub> O | MW                   | 0         |
| 4     | CH <sub>3</sub> / 1.0 | 30         | H <sub>2</sub> O | MW                   | 64        |
| 5     | CH <sub>3</sub> / 1.0 | 45         | H <sub>2</sub> O | MW                   | 63        |
| 6     | CH <sub>3</sub> / 1.0 | 60         | H <sub>2</sub> O | MW                   | 62        |
| 7     | CH <sub>3</sub> / 1.5 | 30         | H <sub>2</sub> O | MW                   | 78        |
| 8     | NO <sub>2</sub> / 1.5 | 30         | H <sub>2</sub> O | MW                   | 15        |
| 9     | NO <sub>2</sub> / 1.5 | 30         | EtOH             | MW                   | 60        |
| 10    | NO <sub>2</sub> / 1.5 | 30         | 1-BuOH           | MW                   | 75        |
| 11    | NO <sub>2</sub> / 1.5 | 30         | DMF              | MW                   | 30        |

<sup>a</sup> – **1a** 0.23mmol scale, [**1a**] = 0.37 M; <sup>b</sup> – Conventional heating – heating mantle or beads bath, reflux; MW – microwave heating, 90°C.

**Table S4.** Photophysical properties of non-symmetric squaraines.<sup>a</sup>

| Squaraine | $\lambda_{ab}^{max}$ / nm | $\lambda_{em}^{max}$ / nm | $\epsilon$ / $M^{-1} cm^{-1}$ |
|-----------|---------------------------|---------------------------|-------------------------------|
| <b>6</b>  | 490                       | 510                       | 69,300                        |
| <b>7</b>  | 493                       | 516                       | 41,100                        |
| <b>8</b>  | 530                       | NF <sup>b</sup>           | 21,200                        |
| <b>9</b>  | 505                       | 518                       | 74,000                        |
| <b>10</b> | 467                       | 505                       | 27,400                        |
| <b>11</b> | 505                       | NF <sup>b</sup>           | 28,500                        |
| <b>12</b> | 513                       | 526                       | 68,200                        |
| <b>13</b> | 490                       | 510                       | 45,400                        |
| <b>14</b> | 433                       | 450                       | 63,200                        |
| <b>15</b> | 412                       | 473                       | 37,400                        |
| <b>16</b> | 614                       | 625                       | 1,499,000                     |
| <b>17</b> | 610                       | 616                       | 2,005,000                     |
| <b>18</b> | 598                       | 612                       | 56,000                        |

<sup>a</sup> – Solvent DMSO; for  $\epsilon$  determination, absorption was determined at several concentrations of the dye to assure a linear dependence is observed between absorption (A) and dye's concentration; see individual spectra for specific conditions ([dye],  $\lambda_{ex}$ ). <sup>b</sup> – NF = no fluorescence signal was detected over a range of dye's concentrations.

## SYNTHESIS AND CHARACTERIZATION OF PYRROLYL-SEMISQUARAINES

### Synthesis of semisquaraine **1a**:

A round bottom flask was charged with a stirring bar, water (100 mL), and squaric acid (21.16 g, 185.5 mmol). Once the solution was brought to reflux, 2,4-dimethyl-3-ethyl-pyrrole (5.00 mL, 37.1 mmol) was added in one portion, and the reaction mixture was refluxed for 15 min. The reaction mixture was removed from heat, water (150 mL) was added, and the mixture brought to reflux. Next, while hot, the supernatant was decanted, and water (250 mL) was added to the residue, and the mixture was brought to reflux, followed by decantation. This sequence was repeated yep more times (total volume of water used 1000 mL for reaction and washings). After the final wash, the solid was filtered, dried under vacuum to give **1a** as a green solid (7.90 g, 97 %).

$^1\text{H}$  NMR (DMSO- $d_6$ ):  $\delta$  10.57 (s, 1H), 2.33 (q,  $J$  = 7.5 Hz, 2H), 2.33 (s, 3H), 0.99 (t,  $J$  = 7.5 Hz, 3H).

$^{13}\text{C}$  (DMSO- $d_6$ ):  $\delta$  191.41, 190.18, 166.26, 134.85, 126.03, 124.76, 117.20, 16.72, 15.07, 11.05, 10.29.

HRMS (ESI;  $\text{C}_{12}\text{H}_{13}\text{NO}_3$ )  $m/z$ : calc. for  $[\text{M}+\text{H}]^+$  220.0974; found: 220.0973.

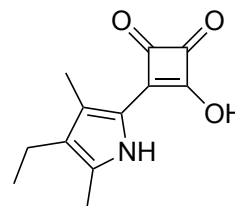

*Recovery of squaric acid*: the water washes were combined, and charcoal (10.0 g) was added. The mixture was brought to reflux, filtered while hot, and water removed in vacuo, to give white squaric acid (16.07 g, 95 % recovery).

It should also be noted that unreacted squaric acid was also recovered according to the following procedure: after the final wash with water, **4a** was washed with  $\text{NaHCO}_3$  (sat.), followed by HCl (1 M). All aqueous fractions were combined, and water removed in vacuo (using ca. 40-50°C bath). Separation of squaric acid from NaCl was subsequently done by treating squaric acid/NaCl mixture with DMF, followed by filtration and removal of DMF in vacuo. The resulting squaric acid was subjected to the aforementioned charcoal treatment (i.e., charcoal/water/reflux) to get rid of light green color, to produce white solid, whose spectral characteristics matched those of the authentic/commercial squaric acid.

### Semisquaraine **4a**:

A round bottom flask was charged with a stirring bar, water (20 mL), and squaric acid (846.5 mg, 7.42 mmol). Once the solution was brought to 80 °C, 1,2,5-trimethylpyrrole (1.00 mL, 7.39 mmol) was added in one portion, and the reaction mixture was stirred at 80 °C for 60 min. The reaction mixture was removed from heat, cooled to room temperature, and filtered. Next, the precipitate was washed with water (3 x 10 mL). Then, the precipitate was washed with diethyl ether (2 x 5 mL) and dried under vacuum to give **4a** as a maroon solid (1.27 g, 84 %).

$^1\text{H}$  NMR (DMSO- $d_6$ ):  $\delta$  6.32 (d,  $J$  = 0.9 Hz, 1H), 3.42 (s, 3H), 2.62 (s, 3H), 2.18 (s, 3H).

$^{13}\text{C}$  (DMSO- $d_6$ ):  $\delta$  193.77, 192.80, 172.92, 133.39, 130.60, 109.65, 104.41, 30.46, 12.23, 12.06.

HRMS (ESI;  $\text{C}_{11}\text{H}_{11}\text{NO}_3$ )  $m/z$ : calc. for  $[\text{M}+\text{H}]^+$  206.0817; found: 206.0818.

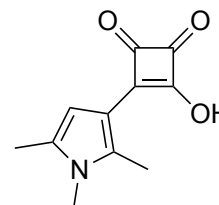

## SYNTHESIS AND CHARACTERIZATION OF NON-SYMMETRIC SQUARINE DYES

### General procedure for the synthesis of 1-N-alkyl/aryl-3-pyrrolylsquaraines 6–15.

#### Squaraine 6:

Microwave vial was charged with a stirring bar, semisquaraine **1a** (50.0 mg, 0.23 mmol), 1-BuOH (0.6 mL), and toluidine (0.34 mmol, 1.5 eq), sealed and subjected to MW irradiation at 90°C for 30 min. After the reaction was cooled to room temperature, the reaction mixture was sonicated (5 min), filtered and washed with acetone, and the red solid was dried under vacuum to give **6** (54.9 mg, 78 % yield).

$^1\text{H}$  NMR (DMSO- $d_6$ ):  $\delta$  11.89 (s, 1H), 11.02 (s, 1H), 7.79 (d,  $J$  = 8.5 Hz, 2H), 7.21 (d,  $J$  = 8.2 Hz, 2H), 2.49 (s, 3H), 2.36 (q,  $J$  = 7.4 Hz, 2H), 2.30 (s, 3H), 2.29 (s, 3H), 1.01 (t,  $J$  = 7.5 Hz, 3H).

$^{13}\text{C}$  (DMSO- $d_6$ ):  $\delta$  179.41, 173.47, 171.51, 169.58, 140.12, 135.67, 135.21, 130.38, 130.16, 127.42, 121.55, 120.81, 21.01, 17.21, 15.23, 11.90, 11.21.

HRMS (ESI;  $\text{C}_{19}\text{H}_{20}\text{N}_2\text{O}_2$ )  $m/z$ : calc. for  $[\text{M}+\text{H}]^+$  309.1603; found: 309.1600.

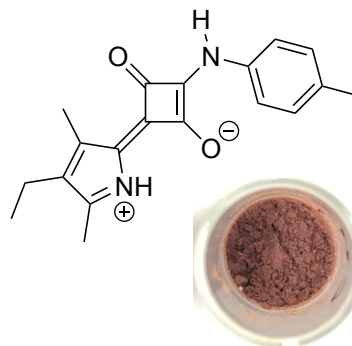

#### Squaraine 7:

Obtained according to the general procedure; 90 % yield.

$^1\text{H}$  NMR (DMSO- $d_6$ ):  $\delta$  11.89 (s, 1H), 10.94 (s, 1H), 7.85 (d,  $J$  = 9.0 Hz, 2H), 6.99 (d,  $J$  = 9.1 Hz, 2H), 3.77 (s, 3H), 2.49 (s, 3H), 2.36 (q,  $J$  = 7.4 Hz, 2H), 2.28 (s, 3H), 2.29 (s, 3H), 1.01 (t,  $J$  = 7.5 Hz, 3H).

$^{13}\text{C}$  (DMSO- $d_6$ ):  $\delta$  178.60, 173.06, 171.21, 168.07, 157.11, 138.84, 130.87, 129.26, 126.62, 121.92, 120.96, 114.48, 55.40, 16.77, 14.82, 11.41, 10.73

HRMS (ESI;  $\text{C}_{19}\text{H}_{20}\text{N}_2\text{O}_3$ )  $m/z$ : calc. for  $[\text{M}+\text{H}]^+$  325.1552; found: 325.1582.

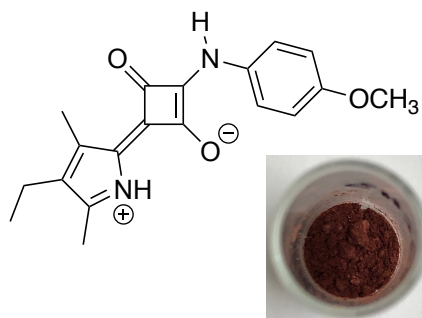

#### Squaraine 8:

Obtained according to the general procedure; 75 % yield.

$^1\text{H}$  NMR (DMSO- $d_6$ ):  $\delta$  12.07 (s, 1H), 11.45 (s, 1H), 8.26 (d,  $J$  = 9.2 Hz, 2H), 8.07 (d,  $J$  = 8.0 Hz, 2H), 2.54 (s, 3H), 2.39 (q,  $J$  = 7.6 Hz, 2H), 2.35 (s, 3H), 1.03 (t,  $J$  = 7.4 Hz, 3H).

$^{13}\text{C}$  ( $\text{CF}_3\text{CO}_2\text{H}$  w/DMSO- $d_6$  as external standard): 172.96, 171.22, 159.36, 157.01, 155.29, 143.49, 141.94, 140.98, 134.29, 125.02, 122.34, 119.15, 15.71, 11.40, 10.45, 8.95

HRMS (ESI;  $\text{C}_{18}\text{H}_{17}\text{N}_3\text{O}_4$ )  $m/z$ : calc. for  $[\text{M}+\text{H}]^+$  340.1297; found: 340.1281.

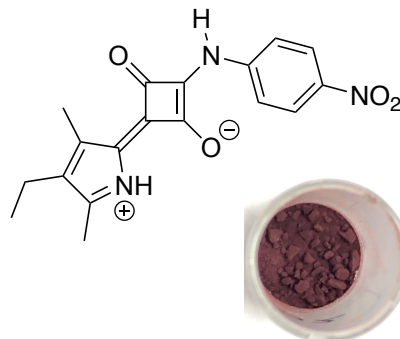

### Squaraine 9:

Obtained according to the general procedure; 50 % yield.

$^1\text{H}$  NMR (DMSO- $d_6$ ):  $\delta$  12.91 (s, 1H), 11.98 (s, 1H), 11.30 (s, 1H), 8.00 (d,  $J$  = 8.8 Hz, 2H), 7.94 (d,  $J$  = 8.8 Hz, 2H), 2.53 (s, 3H), 2.38 (q,  $J$  = 7.4 Hz, 2H), 2.34 (s, 3H), 1.02 (t,  $J$  = 7.4 Hz, 3H).

$^{13}\text{C}$  (DMSO- $d_6$ ):  $\delta$  177.90, 171.41, 166.77, 142.74, 141.60, 132.09, 130.63, 128.23, 126.53, 121.74, 119.85, 30.71, 16.72, 14.60, 11.61, 10.82.

HRMS (ESI;  $\text{C}_{19}\text{H}_{18}\text{N}_2\text{O}_4$ )  $m/z$ : calc. for  $[\text{M}+\text{H}]^+$  339.1345; found: 339.1348.

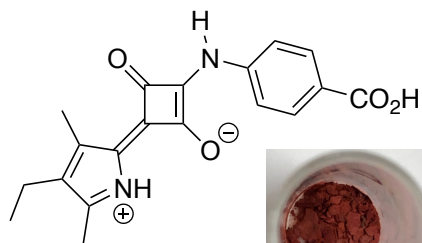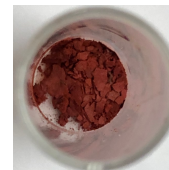

### Squaraine 10:

Obtained according to the general procedure, except for the purification step. Purification was done as follows: the crude solid was dissolved in minimum amount of DMSO, followed by trituration with acetone, and the product was collected by filtration; 57 % yield.

$^1\text{H}$  NMR (DMSO- $d_6$ ):  $\delta$  12.11 (bs, 1H), 7.87 (d,  $J$  = 9.2 Hz, 2H), 7.00 (d,  $J$  = 9.2 Hz, 2H), 6.53 (d,  $J$  = 0.8 Hz, 1H), 3.78 (s, 3H), 3.44 (s, 3H), 2.79 (s, 3H), 2.20 (s, 3H).

$^{13}\text{C}$  (DMSO- $d_6$ ):  $\delta$  185.00, 176.64, 175.85, 173.64, 157.97, 136.45, 131.72, 130.97, 122.88, 114.96, 113.51, 105.45, 55.88, 31.07, 13.19, 12.57.

HRMS (ESI;  $\text{C}_{18}\text{H}_{18}\text{N}_2\text{O}_3$ )  $m/z$ : calc. for  $[\text{M}+\text{H}]^+$  311.1396; found: 311.1395.

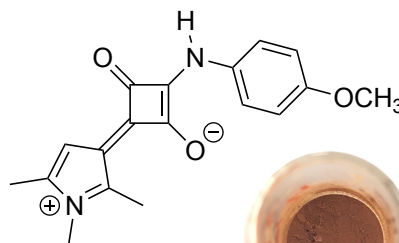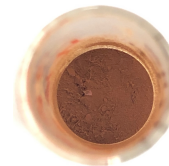

### Squaraine 11:

Obtained according to the general procedure, except for the purification step. Purification was done as follows: the crude solid was dissolved in minimum amount of DMF, followed by trituration with diethyl ether, and the product was collected by filtration; 71 % yield.

$^1\text{H}$  NMR (DMSO- $d_6$ ):  $\delta$  12.47 (bs, 1H), 8.29 (dt,  $J$  = 9.2, 2.5 Hz, 2H), 8.14 (dt,  $J$  = 9.2, 2.5 Hz, 2H), 6.63 (d,  $J$  = 1.0 Hz, 1H), 3.48 (s, 3H), 2.85 (s, 3H), 2.22 (s, 3H).

$^{13}\text{C}$  (DMSO- $d_6$ ):  $\delta$  189.19, 175.54, 175.26, 149.53, 137.70, 134.70, 130.95, 129.70, 115.56, 113.76, 113.37, 112.77, 105.21, 48.38, 30.92, 13.04, 12.56.

HRMS (ESI;  $\text{C}_{17}\text{H}_{15}\text{N}_3\text{O}_4$ )  $m/z$ : calc. for  $[\text{M}+\text{H}]^+$  326.1141; found: 326.1128.

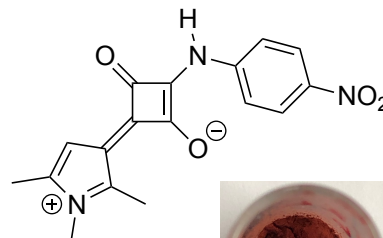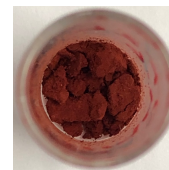

#### Squaraine 12:

Obtained according to the general procedure; 80 % yield.

$^1\text{H}$  NMR (DMSO- $d_6$ ):  $\delta$  11.28 (s, 1H), 10.89 (bs, 1H), 8.99 (dd,  $J$  = 4.2, 1.4 Hz, 1H), 8.56 (bs, 1H), 8.48 (dd,  $J$  = 8.4, 1.6 Hz, 1H), 7.84 (d,  $J$  = 7.6 Hz, 1H), 7.69 (m, 2H), 2.53 (s, 3H), 2.38 (q,  $J$  = 7.4 Hz, 2H), 2.33 (s, 3H), 1.03 (t,  $J$  = 7.4 Hz, 3H).

$^{13}\text{C}$  ( $\text{CF}_3\text{CO}_2\text{H}$  w/DMSO- $d_6$  as external standard):  $\delta$  178.00, 176.07, 164.32, 162.81, 161.87, 153.08, 148.40, 146.54, 139.64, 136.10, 134.90, 134.79, 134.40, 132.24, 130.85, 127.45, 126.30, 20.32, 15.94, 15.27, 13.57.

HRMS (ESI;  $\text{C}_{21}\text{H}_{19}\text{N}_3\text{O}_2$ )  $m/z$ : calc. for  $[\text{M}+\text{H}]^+$  346.1556; found: 346.1558.

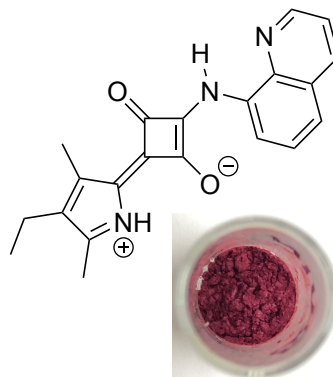

#### Squaraine 13:

Obtained according to the general procedure; 52 % yield.

$^1\text{H}$  NMR (DMSO- $d_6$ ):  $\delta$  12.00 (bs, 1H), 11.23 (s, 1H), 8.97 (bs, 1H), 8.37 (dd,  $J$  = 4.7, 1.4 Hz, 1H), 8.34 (ddd,  $J$  = 8.4, 2.7, 1.4 Hz, 1H), 7.45 (ddd,  $J$  = 8.3, 4.7, 0.6 Hz, 1H), 2.52 (s, 3H), 2.38 (q,  $J$  = 7.5 Hz, 2H), 2.32 (s, 3H), 1.02 (t,  $J$  = 7.5 Hz, 3H).

$^{13}\text{C}$  (DMSO- $d_6$ ):  $\delta$  179.02, 173.10, 171.57, 146.13, 142.47, 142.25, 135.04, 132.09, 128.37, 127.74, 124.39, 121.93, 17.18, 15.10, 12.02, 11.25.

HRMS (ESI;  $\text{C}_{17}\text{H}_{17}\text{N}_3\text{O}_2$ )  $m/z$ : calc. for  $[\text{M}+\text{H}]^+$  296.1399; found: 296.1408.

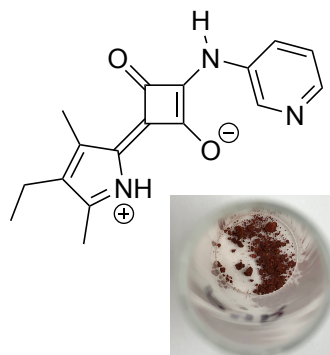

#### Squaraine 14:

Obtained according to the general procedure; 47 % yield.

$^1\text{H}$  NMR (DMSO- $d_6$ ):  $\delta$  10.61 (s, 1H), 10.27 (bs, 1H), 3.69 (t,  $J$  = 6.9 Hz, 2H), 2.41 (s, 3H), 2.32 (q,  $J$  = 7.5 Hz, 2H), 2.22 (s, 3H), 1.59 (m, 2H), 1.25 (m, 26H), 0.99 (t,  $J$  = 7.5 Hz, 3H), 0.86 (t,  $J$  = 6.8 Hz, 3H).

$^{13}\text{C}$  (DMSO- $d_6$ / $\text{CF}_3\text{CO}_2\text{H}$ ):  $\delta$  185.29, 167.58, 158.90, 136.05, 127.50, 125.56, 120.45, 44.62, 31.77, 30.02, 29.51 (overlap), 29.37, 29.33, 29.18, 26.17, 22.57, 17.25, 15.44, 14.44, 11.64, 11.03.

HRMS (ESI;  $\text{C}_{28}\text{H}_{46}\text{N}_2\text{O}_2$ )  $m/z$ : calc. for  $[\text{M}+\text{H}]^+$  443.3638; found: 443.3619.

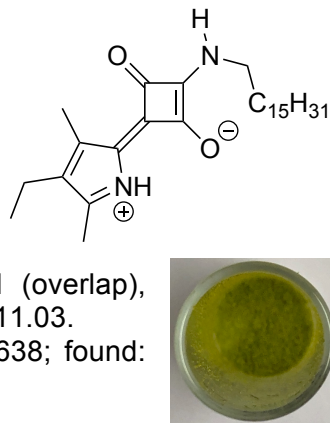

### Squaraine **15**:

Obtained according to the general procedure; 25 % yield.

$^1\text{H}$  NMR (DMSO- $d_6$ ):  $\delta$  10.88 (bs, 1H), 7.01 (t,  $J$  = 7.6 Hz, 1H), 6.49 (m, 4H), 5.17 (s, 2H), 4.76 (s, 2H), 3.42 (s, 3H), 2.73 (s, 3H), 2.18 (s, 3H).

$^{13}\text{C}$  (DMSO- $d_6$ ):  $\delta$  188.73, 175.03, 174.88, 174.74, 149.03, 137.21, 134.25, 130.48, 129.21, 115.11, 113.31, 112.92, 112.29, 104.75, 47.89, 30.42, 12.54, 12.05.

HRMS (ESI;  $\text{C}_{18}\text{H}_{19}\text{N}_3\text{O}_2$ )  $m/z$ : calc. for  $[\text{M}+\text{H}]^+$  310.1556; found: 310.1558.

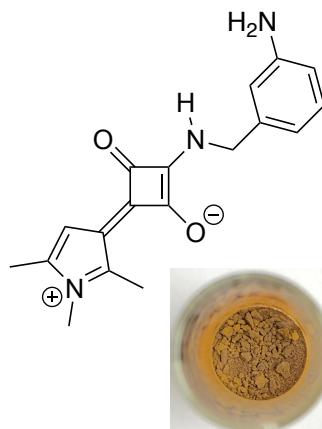

### Synthesis of 1-C-aryl/indolyn-3-pyrrolylsquaraines **16-18**

#### Squaraine **16**:

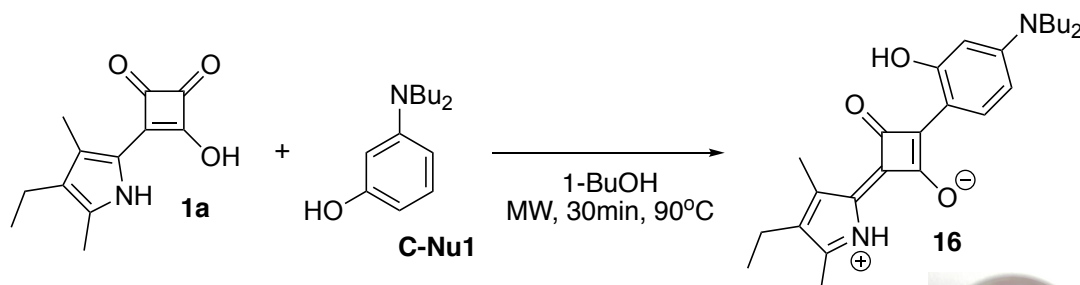

Microwave vial was charged with a stirring bar, semisquaraine **1a** (50.0 mg, 0.228 mmol), 1-BuOH (0.6 mL), and **C-Nu1** (78.1 mg, 0.353 mmol, 1.5 eq.; **C-Nu1** was prepared according to literature procedure [S1]), sealed and subjected to MW irradiation at 90°C for 30 min. After the reaction was cooled to room temperature, the reaction mixture was filtered, washed with EtOH, and the solid was recrystallized from EtOH/ $\text{H}_2\text{O}$  to give **16** (36.9 mg, 38 % yield).

$^1\text{H}$  NMR (DMSO- $d_6$ ):  $\delta$  12.42 (s, 1H), 11.78 (s, 1H), 7.92 (d,  $J$  = 9.1 Hz, 1H), 6.60 (dd,  $J$  = 9.2, 2.4 Hz, 1H), 6.17 (d,  $J$  = 2.4 Hz, 1H), 3.51 (m, 4H), 2.49 (q,  $J$  = 7.5 Hz, 2H), 2.48 (s, 3H), 1.65 (m, 4H), 1.44 (sext,  $J$  = 7.4 Hz, 4H), 1.12 (t,  $J$  = 7.5 Hz, 3H), 1.03 (t,  $J$  = 7.3 Hz, 6H).

$^{13}\text{C}$  (DMSO- $d_6$ ):  $\delta$  196.14, 188.98, 173.28, 162.58, 155.19, 148.47, 135.24, 130.66, 122.61, 109.10, 107.32, 97.97, 50.32, 29.39, 19.54, 16.71, 14.33, 13.92, 13.81, 12.04, 10.82.

HRMS (ESI;  $\text{C}_{26}\text{H}_{34}\text{N}_2\text{O}_3$ )  $m/z$ : calc. for  $[\text{M}+\text{H}]^+$  423.2648; found: 423.2660.

### Squaraine **17**:

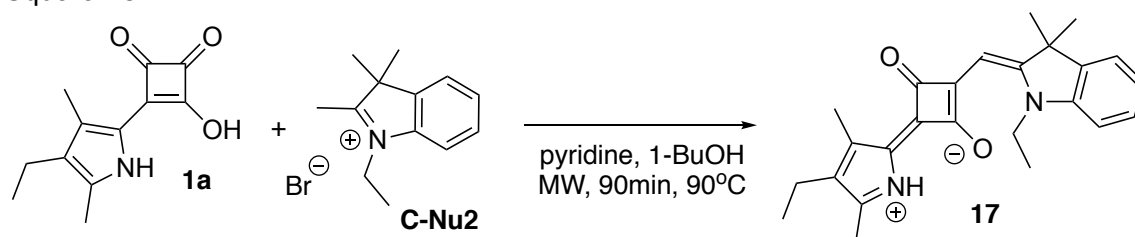

Microwave vial was charged with a stirring bar, semisquaraine **1a** (50.0 mg, 0.228 mmol), 1-BuOH (0.6 mL), **C-Nu2** (94.7 mmol, 0.353 mmol, 1.5 eq.; **C-Nu2** was prepared according to literature procedure [S2]), and pyridine (0.046 mL, 0.570 mmol, 2.5 eq.) sealed and subjected to MW irradiation at 90°C for 90 min. After the reaction was cooled to room temperature, the reaction mixture was filtered, washed with EtOH, and the solid was recrystallized from EtOH/H<sub>2</sub>O to give **17** (40.7 mg, 46 % yield).

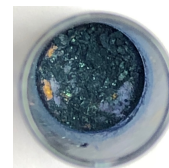

<sup>1</sup>H NMR (DMSO-*d*<sub>6</sub>): δ 11.11 (s, 1H), 7.56 (dd, *J* = 7.2, 1.1 Hz, 1H), 7.40 (m, 2H), 7.22 (td, *J* = 7.1, 1.6 Hz, 1H), 5.84 (s, 1H), 4.18 (q, *J* = 7.1 Hz, 2H), 3.35 (s, 1H), 2.51 (s, 3H; overlap with DMSO), 2.37 (q, *J* = 7.6 Hz, 2H), 2.32 (s, 3H), 1.71 (s, 6H), 1.30 (t, *J* = 7.1 Hz, 3H), 1.02 (t, *J* = 7.5 Hz, 3H).

<sup>13</sup>C (DMSO-*d*<sub>6</sub>): δ 181.58, 170.81, 167.38, 142.31, 141.90, 141.89, 131.16, 128.58, 128.39, 124.85, 122.82, 122.33, 111.19, 87.49, 49.67, 38.78, 26.63, 17.28, 15.15, 12.37, 12.09, 11.27.

HRMS (ESI; C<sub>25</sub>H<sub>28</sub>N<sub>2</sub>O<sub>2</sub>) *m/z*: calc. for [M+H]<sup>+</sup> 389.2229; found: 389.2242.

### Squaraine **18**:

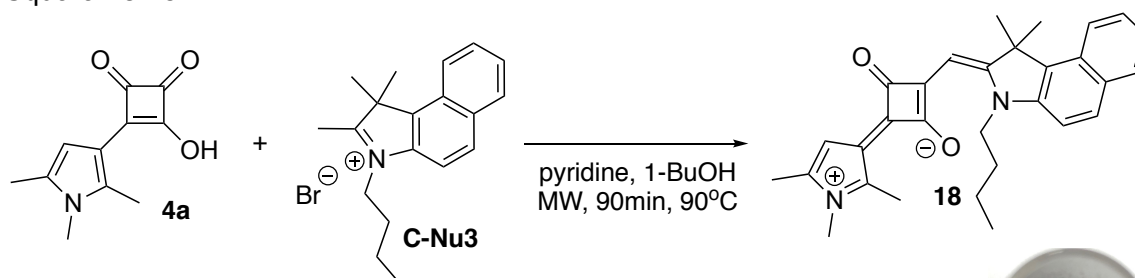

Microwave vial was charged with a stirring bar, semisquaraine **4a** (50.0 mg, 0.244 mmol), 1-BuOH (0.6 mL), **C-Nu3** (126.7 mg, 0.366 mmol, 1.5 eq; **C-Nu3** was prepared according to literature procedure [S2]), and pyridine (0.049 mL, 0.610 mmol, 2.5 eq.) sealed and subjected to MW irradiation at 90°C for 90 min. After the reaction was cooled to room temperature, the reaction mixture was filtered, washed with EtOH, and the residue was subjected to column chromatography (SiO<sub>2</sub>, CHCl<sub>3</sub>/ethyl acetate – 2/1) to give **18** (33.4 mg, 30% yield).

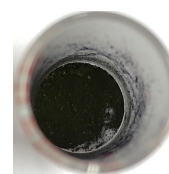

<sup>1</sup>H NMR (DMSO-*d*<sub>6</sub>): δ 8.30 (d, *J* = 8.5 Hz, 1H), 8.09 (m, 2H), 7.85 (d, *J* = 8.9 Hz, 1H), 7.68 (ddd, *J* = 8.4, 6.9, 1.3 Hz, 1H), 7.54 (ddd, *J* = 8.1, 6.8, 1.1 Hz, 1H), 6.58 (d, *J* = 1.2 Hz, 1H), 6.01 (s, 1H), 4.36 (t, *J* = 7.3 Hz, 2H), 3.46 (s, 3H), 2.85 (s, 3H), 2.21 (d, *J* = 1.1 Hz, 3H), 1.97 (s, 6H), 1.78 (pent, *J* = 7.3 Hz, 3H), 1.43 (sext, *J* = 7.4 Hz, 2H), 0.95 (t, *J* = 7.4 Hz, 3H).

<sup>13</sup>C (DMSO-*d*<sub>6</sub>): δ 187.68, 175.45, 174.35, 139.61, 137.08, 135.18, 132.16, 131.97, 130.49, 130.24, 128.19, 128.05, 125.56, 123.00, 114.31, 112.39, 105.72, 87.87, 52.12, 44.14, 31.12, 29.78, 26.33, 20.02, 14.21, 13.26, 12.65.

HRMS (ESI; C<sub>30</sub>H<sub>32</sub>N<sub>2</sub>O<sub>2</sub>) *m/z*: calc. for [M+H]<sup>+</sup> 453.2532; found: 453.2554.

## GREEN CHEMISTRY CONSIDERATIONS, METRICS, AND CALCULATIONS

### General considerations

It could be assumed that processes that require fewer synthetic steps and fewer reagents would be more attractive from the green chemistry/sustainability points of view. However, to gain a quantitative assessment of green chemistry metrics, literature preparation of **1a** [S3] was taken as a reference for comparison. It should be noted, however, that it was not the goal of the authors [S3] to prepare **1a** in a more environmentally benign manner. Thus, the assessments/calculations that follow should not be viewed as green chemistry shortcomings of the published procedure.

### Literature procedure for the synthesis of **1a** [S3]:

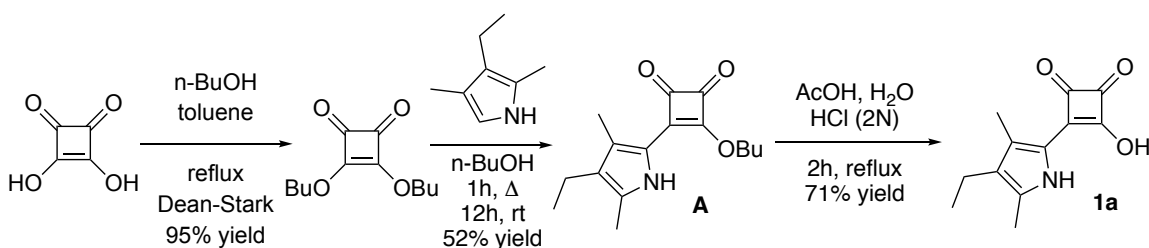

Step 1 was accomplished according to literature procedure [S4].

Overall yield: 35%

Number of step from squaric acid: 3

Intermediate **A** was recrystallized from AcOH, quantities of AcOH were not specified.

### Our synthesis of **1a**:

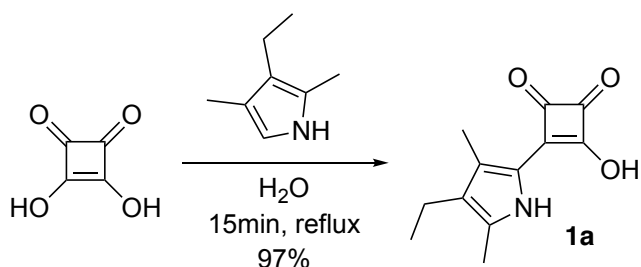

Overall yield: 97%

Number of steps from squaric acid: 1

HOW SYNTHESIS OF **1a** RELATES TO 12 PRINCIPLES OF GREEN CHEMISTRY [5]

|    | <b>Green Chemistry Principle</b>              | <b>Features of 1a synthesis</b>                                                                |
|----|-----------------------------------------------|------------------------------------------------------------------------------------------------|
| 1  | Waste prevention                              | H <sub>2</sub> O is the only by-product                                                        |
| 2  | Atom efficiency                               | 92.4 % is only 7.6 % lower than the optimal AE                                                 |
| 3  | Less hazardous/toxic materials                | avoids the use of SOCl <sub>2</sub> , HCl, LiOH, toluene                                       |
| 4  | Safer product by design                       | –                                                                                              |
| 5  | Innocuous solvents and auxiliaries            | H <sub>2</sub> O is the only solvent used for the reaction                                     |
| 6  | Energy efficient by design                    | shortened reaction times from hours to minutes;<br>reactions could be done at room temperature |
| 7  | Renewable rather than depleting raw material  | –                                                                                              |
| 8  | Shorter synthesis (avoid derivatization)      | 1 step synthesis from commercially available compounds                                         |
| 9  | Catalytic rather than stoichiometric reagents | –                                                                                              |
| 10 | Design products for degradation               | –                                                                                              |
| 11 | Analytical methods for pollution prevention   | –                                                                                              |
| 12 | Inherently safer processes                    | simple reaction set-up, standard isolation and purification processes                          |

## E-FACTOR (E)

$$\text{E-factor} = \frac{\text{total mass of waste}}{\text{mass of product}}$$

Key features: relies on the quantity of waste produced [S6].

However, E-factor may not be very informative, due to a somewhat ambiguous definition of what “waste” is, especially when “waste” is related to solvents used. Since many solvents could, in principle, be recovered, it could be argued that solvents should not be used in the calculation. Yet, it is not always obvious that the recovered solvent is of sufficient quality to be reused (or at least the quality of the recovered solvent should be established along with the efficiency of the solvent recovery).

Here, for simplicity, solvents used for reactions, isolation and purification of the products are not considered in calculation of E-factors for both the literature and our syntheses of **1a**.

### *Literature procedure for the synthesis of 1a [S3]:*

Step 1 was accomplished according to literature procedure [S4]. Step 3 leading to **1a** was done on 0.02mol scale; thus, the amounts of the reagents, solvents, etc used in steps 1 and 2 were recalculated to this scale, with considerations of the yields in each step.

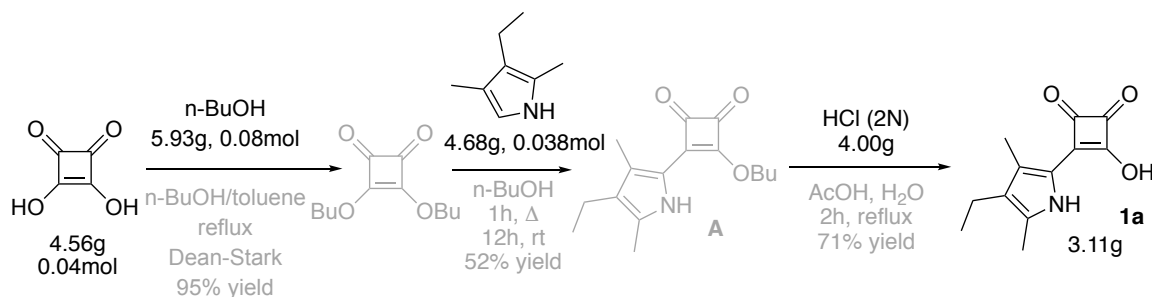

Amounts used to produce 3.11g of **1a**:

Step 1: squaric acid (**4.56g**, 0.04mol), n-BuOH (**5.93g**, 0.08mol; only 2 equivalents of n-BuOH are considered as reagent here, the rest is considered as solvent; total volume of n-BuOH is 60mL. Notably, using 2 equivalents of n-BuOH to obtain the corresponding dialkoxy-squarate is just an assumption; literature accounts do indicate that large excess of alcohols is required to obtain dialkoxy-squarate[S#, S#]).

Step 2: pyrrole (**4.68g**, 0.038mol).

Step 3: HCl (**4.00g**; 4mL of 2N HCl), AcOH is considered a solvent.

Amount of waste: (4.56 + 5.93 + 4.68 + 4.00) – 3.11g = 19.17g

$$\text{E-factor} = \frac{19.17}{3.11} = 6.16$$

Our procedure for the synthesis of **1a**:

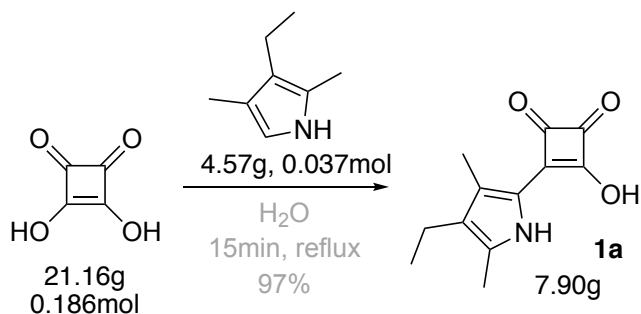

a) *E-factor calculations without accounting for recovered squaric acid:*

Amounts used to produce 7.90g of **1a**: squaric acid (21.16g), pyrrole (4.57g)

Amount of waste:  $(21.16 + 4.57) - 7.90 = 17.83\text{g}$

$$\text{E-factor} = \frac{17.83}{7.90} = 2.26$$

b) *E-factor calculations accounting for recovered squaric acid:*

Amounts used to produce 7.90g of **1a** and with recovered 16.07g of squaric acid: squaric acid 21.16g, pyrrole 4.57g

Amount of waste:  $(21.16 + 4.57) - (7.90 + 16.07) = 1.76\text{g}$

$$\text{E-factor} = \frac{1.76}{7.90} = 0.22$$

## ATOM ECONOMY (AE)

$$AE = \frac{\text{MW of product}}{\text{sum of MWs of reactants/reagents}} \times 100 \%$$

Key features: reaction yield, excess of reactants and reagents as well as solvents are not considered [S6].

*Literature procedure for the synthesis of 1a [S3]:*

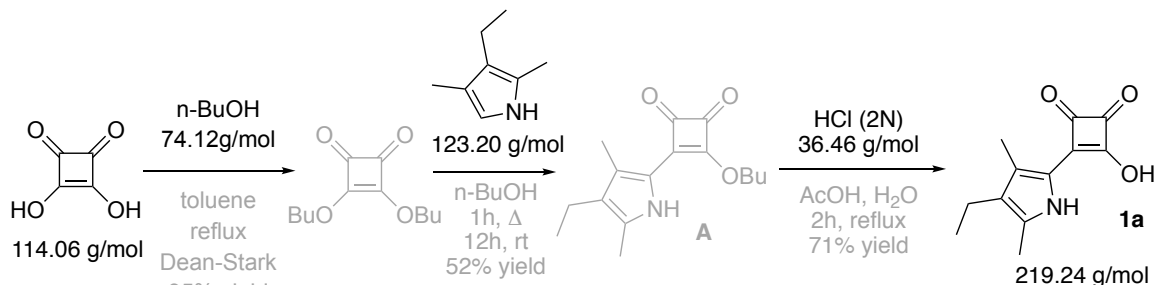

$$AE = \frac{219.24}{114.06 + 74.12 + 123.20 + 36.46} \times 100\% = 63.0\%$$

Step 1 was accomplished according to literature procedure [S4].

*Our procedure for synthesis of 1a:*

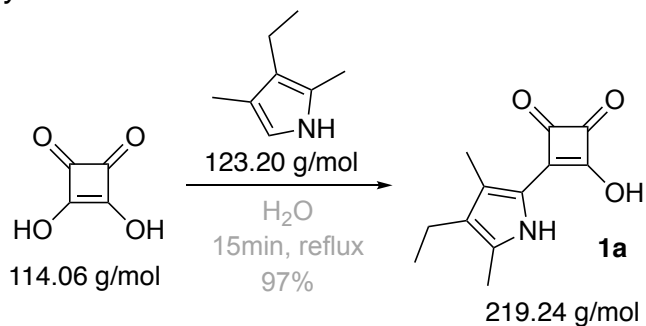

$$AE = \frac{219.24}{114.06 + 123.20} \times 100\% = 92.4\%$$

## MASS INTENSITY (MI)

$$MI = \frac{\text{total mass used in the process}}{\text{mass of product}}$$

Key features: yields, mass of all reagents and solvents (including “acid, base, salt and organic solvent washes, and organic solvents used for extractions, crystallizations, or for solvent switching”) are taken into consideration.[S6] However, water is excluded from mass calculations due to somewhat insignificant impact on the environment and also because “it skews mass data in many processes”. [S6] Process MI (PMI) accounts for all solvents, including water, see next subsection.

*Literature procedure for 1a [S3]:*

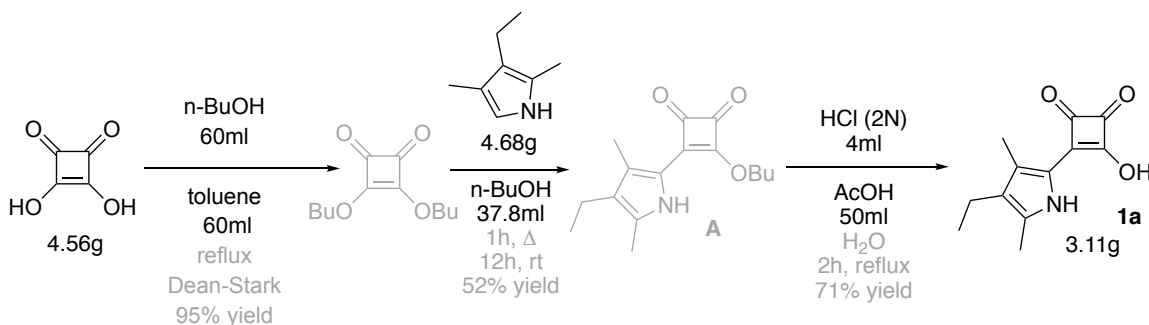

Step 1 was accomplished according to literature procedure [S4]. Step 3 leading to **1a** was done on 0.02mol scale; thus, the amounts of the reagents, solvents, etc used in steps 1 and 2 were recalculated to this scale, with considerations of the yields in each step.

Step 1: squaric acid (**4.56g**, 0.040mol), n-BuOH (**48.60g**, 60mL), toluene (**52.02g**, 60mL)  
 Step 2: kryptopyrrole (**4.68g**, 0.038mol), n-BuOH (**30.65g**, 37.80mL); AcOH used for crystallization is not accounted for, because the amounts were not reported.  
 Step 3: AcOH (**52.50g**, 50mL), HCl (**4.00g**, 4mL of 2N solution)

Amount of product **1a**: 3.11g

$$MI = \frac{4.56 + 86.6 + 52.02 + 4.68 + 30.65 + 52.50 + 4.00}{3.11} = 75.6$$

Our procedure for **1a**:

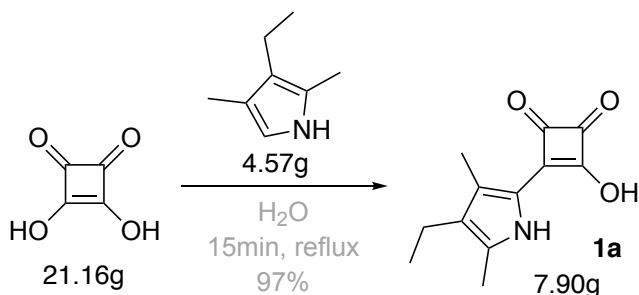

a) MI calculations without accounting for recovered squaric acid:

Step 1: squaric acid (**21.16g**, 0.186mol), kryptopyrrole (**4.57g**, 0.037mol).

Amount of product **1a**: 7.90g

$$\text{MI} = \frac{21.16 + 4.75}{7.90} = 3.3$$

b) MI calculations accounting for recovered squaric acid:

Step 1: squaric acid (**21.16g**, 0.186mol), kryptopyrrole (**4.57g**, 0.037mol).

Recovery step: charcoal (**10.00g**), acetone (**39.20g**, 50mL)

Amount of product **1a**: 7.90g; amount of recovered squaric acid: 16.07g

$$\text{MI} = \frac{21.16 + 4.75 + 10.00 + 39.2}{7.90 + 16.07} = 3.1$$

It is of interest to point out that the use of acetone and charcoal during the recovery step of squaric acid, indicates that recovery of squaric acid may not be beneficial, if judged strictly by the numerical value of MI. Arguably, other factors should be taken into account, especially in regard to costs of squaric acid, charcoal and acetone (for illustrative purposes only, see the table below).

|                        | Squaric acid  | Acetone           | Charcoal          |
|------------------------|---------------|-------------------|-------------------|
| Vendor                 | TCI (America) | Fisher Scientific | Fisher Scientific |
| Catalog #              | D1399         | AC423240250       | AC124370250       |
| Quantity <sup>a</sup>  | 25g           | 25L               | 25kg              |
| Price of the unit / \$ | 165.00        | 746.50            | 873.50            |
| <b>Price: \$/mol</b>   | <b>753.00</b> | <b>2.00</b>       | <b>0.42</b>       |

<sup>a</sup> – largest quantity available for sale was considered.

## PROCESS MASS INSTENSITY (PMI)

$$\text{PMI} = \frac{\text{total mass used in the process (incl. H}_2\text{O)}}{\text{mass of product}}$$

Key features: yields, mass of all reagents and solvents, including water (!), is taken into consideration.[S6]

*Literature procedure for 1a [#]:*

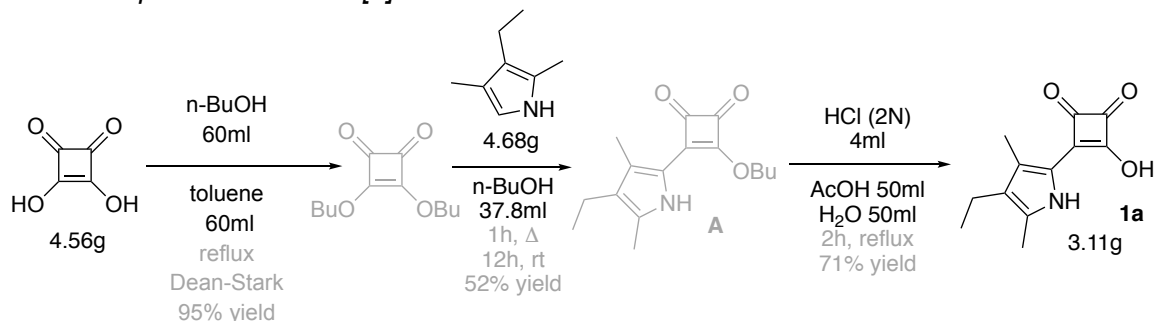

Step 1 was accomplished according to literature procedure [S4].

Step 1: squaric acid (**4.56g**, 0.040mol), n-BuOH (**48.60g**, 60mL), toluene (**52.02g**, 60mL)

Step 2: kryptopyrrole (**4.68g**, 0.038mol), n-BuOH (**30.65g**, 37.80mL); AcOH used for crystallization is not accounted for, because the amounts were not reported.

Step 3: AcOH (**52.50g**, 50mL), H<sub>2</sub>O (**50.00g**, 50mL), HCl (**4.00g**, 4mL of 2N solution). **1a** was isolated by filtration from the reaction mixture, and washed with ether, yet the volume of ether was not reported; thus, it was not included in the calculation of PMI.

Amount of product **1a**: 3.11g

$$\text{PMI} = \frac{4.56 + 86.6 + 52.02 + 4.68 + 30.65 + 52.45 + 50.00 + 4.00}{3.11} = 82.3$$

Our procedure for **1a**:

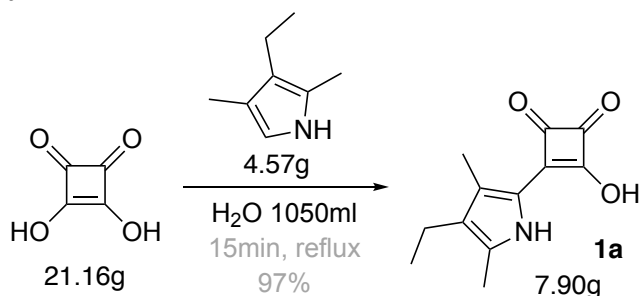

a) PMI calculations without accounting for recovered squaric acid:

Step 1: squaric acid (**21.16g**, 0.186mol), kryptopyrrole (**4.57g**, 0.037mol), H<sub>2</sub>O (**1000.00g**, 100mL were used in the synthesis, 900mL were used during the isolation of **1a**).

Amount of product **1a**: 7.90g

$$\text{PMI} = \frac{21.16 + 4.57 + 1000.00}{7.90} = 129.8$$

b) PMI calculations accounting for recovered squaric acid:

Step 1: squaric acid (**21.16g**, 0.186mol), kryptopyrrole (**4.57g**, 0.037mol), H<sub>2</sub>O (**1000.00g**, 100mL were used in the synthesis, 900mL were used during the isolation of **1a**).

Recovery step: charcoal (**10.00g**), acetone (**39.20g**, 50mL)

Amount of product **1a**: 7.90g; amount of recovered squaric acid: 16.07g

$$\text{PMI} = \frac{21.16 + 4.57 + 1000.00 + 39.20 + 10.00}{7.90 + 16.07} = 44.8$$

## UV-VIS AND FLUORESCENCE EMISSION SPECTRA OF DYES 6 – 18 in DMSO

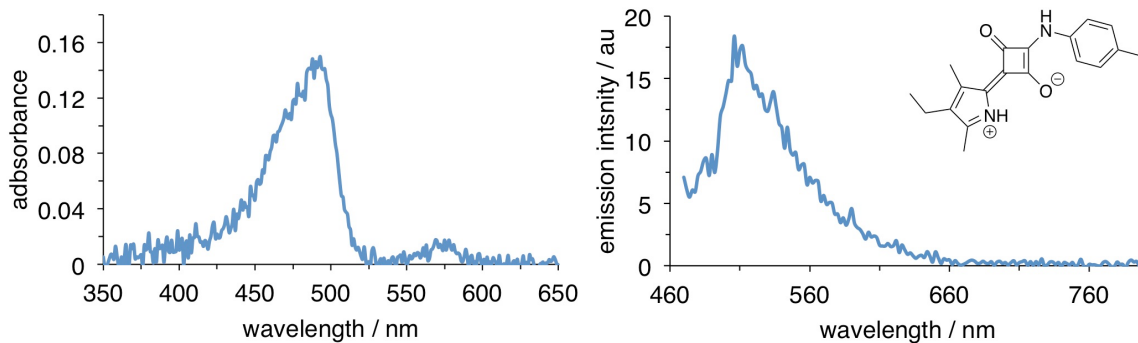

UV-Vis (left) and fluorescence emission (right) spectra of dye **6**.  
Conditions: [**6**] = 2  $\mu$ M,  $\lambda_{\text{ex}}$  = 450 nm.

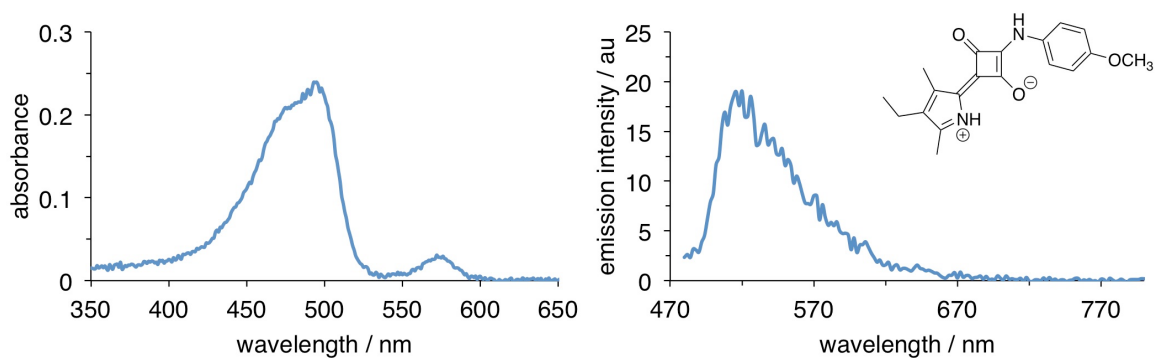

UV-Vis (left) and fluorescence emission (right) spectra of dye **7**.  
Conditions: [**7**] = 6  $\mu$ M,  $\lambda_{\text{ex}}$  = 470 nm.

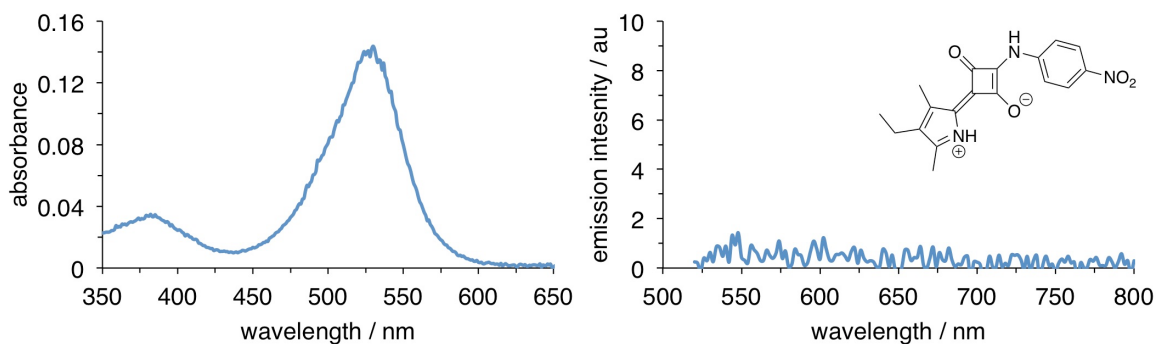

UV-Vis (left) and fluorescence emission (right) spectra of dye **8**.  
Conditions: [**8**] = 10  $\mu$ M,  $\lambda_{\text{ex}}$  = 510 nm.

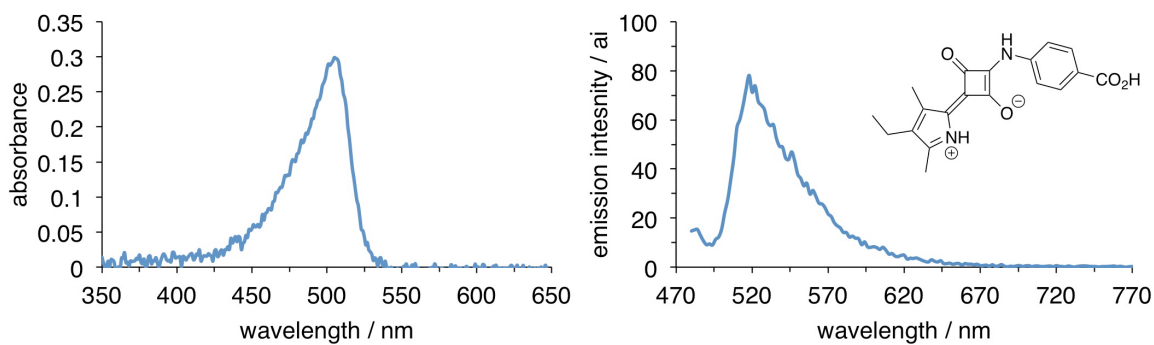

UV-Vis (left) and fluorescence emission (right) spectra of dye **9**.  
Conditions: [**9**] = 4  $\mu$ M,  $\lambda_{\text{ex}}$  = 470 nm.

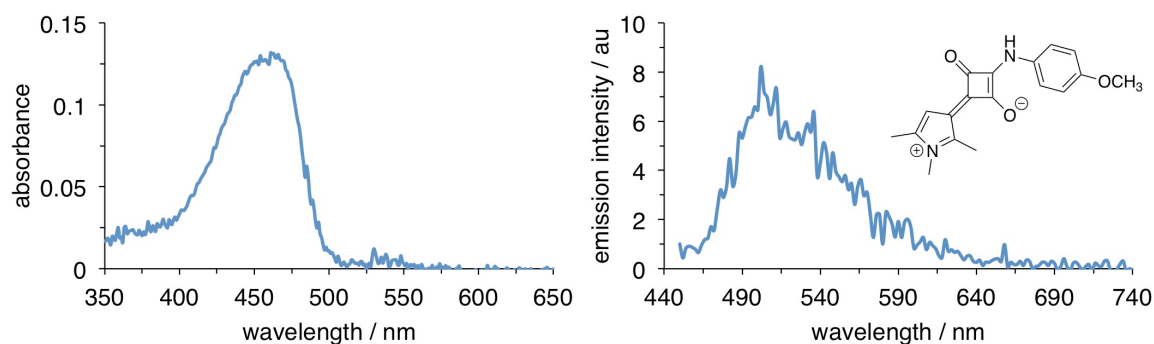

UV-Vis (left) and fluorescence emission (right) spectra of dye **10**.  
Conditions: [**10**] = 4  $\mu$ M,  $\lambda_{\text{ex}}$  = 440 nm.

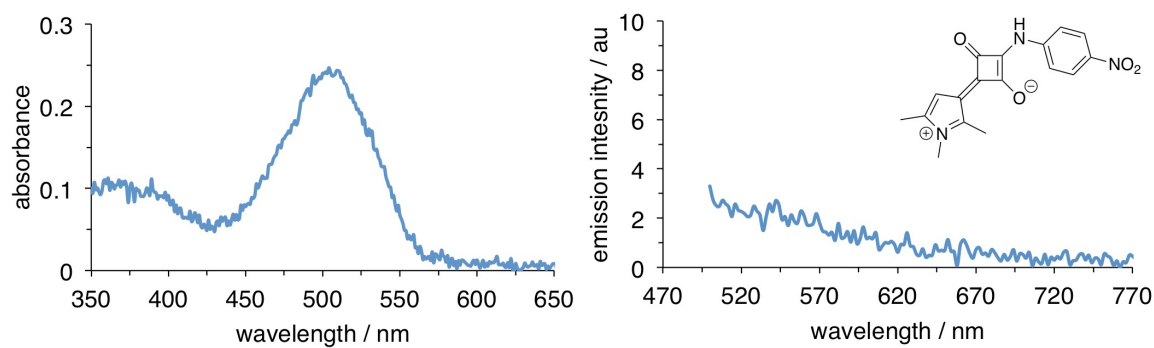

UV-Vis (left) and fluorescence emission (right) spectra of dye **11**.  
Conditions: [**11**] = 8  $\mu$ M,  $\lambda_{\text{ex}}$  = 470 nm.

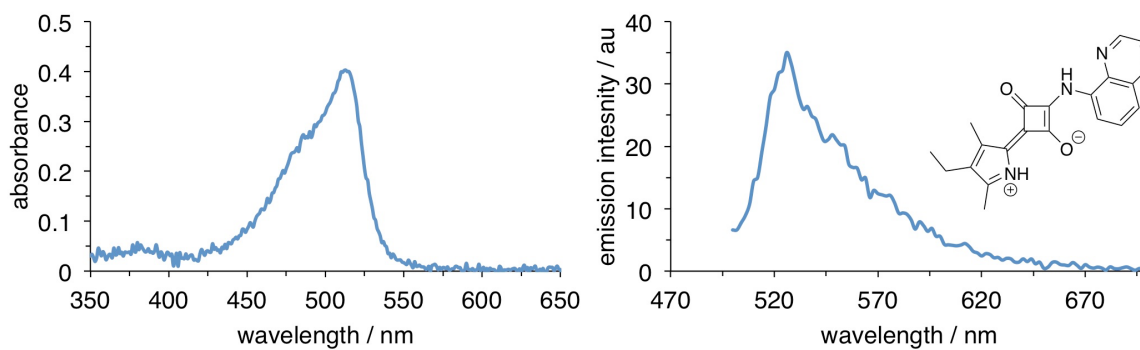

UV-Vis (left) and fluorescence emission (right) spectra of dye **12**.

Conditions: [**12**] = 6  $\mu$ M,  $\lambda_{\text{ex}}$  = 470 nm.

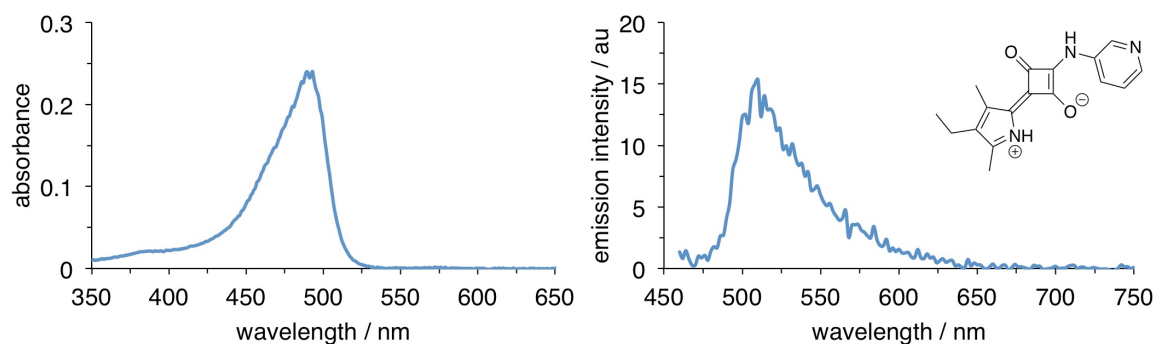

UV-Vis (left) and fluorescence emission (right) spectra of dye **13**.

Conditions: [**13**] = 4  $\mu$ M,  $\lambda_{\text{ex}}$  = 450 nm.

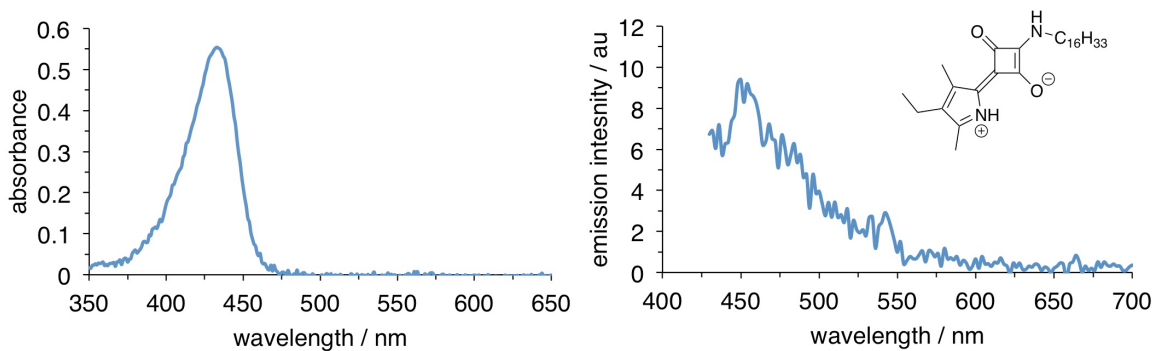

UV-Vis (left) and fluorescence emission (right) spectra of dye **14**.

Conditions: [**14**] = 8  $\mu$ M,  $\lambda_{\text{ex}}$  = 400 nm.

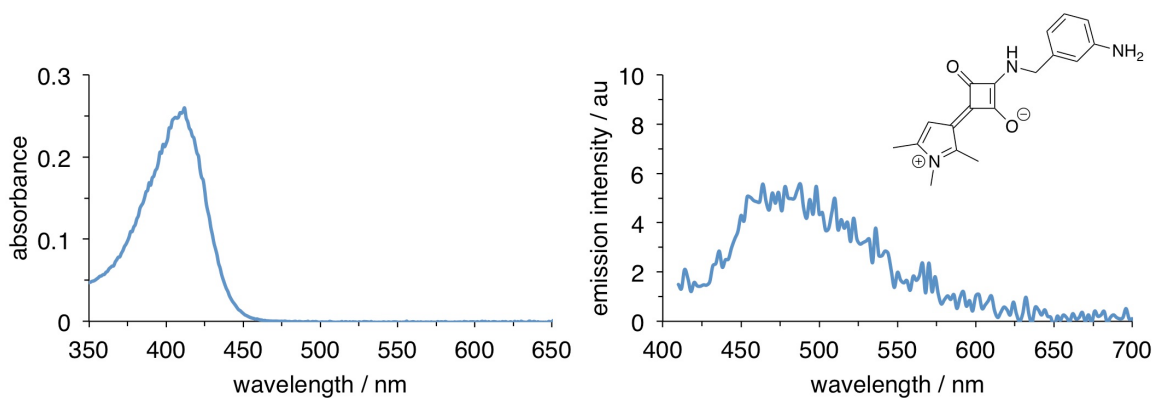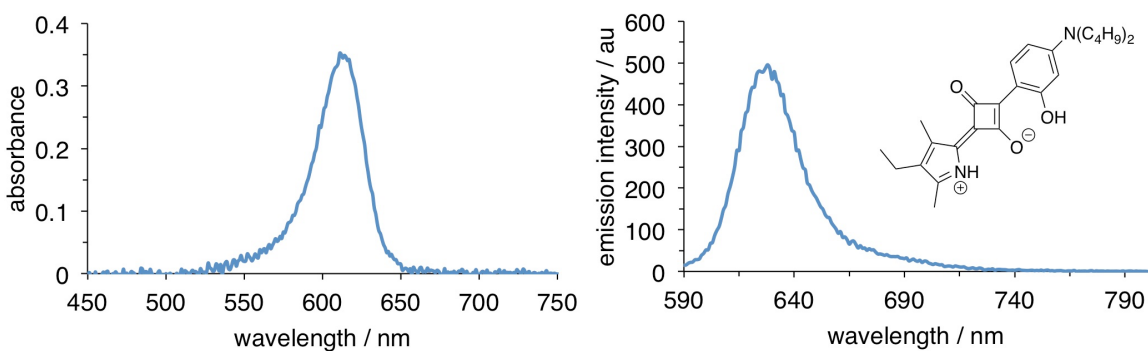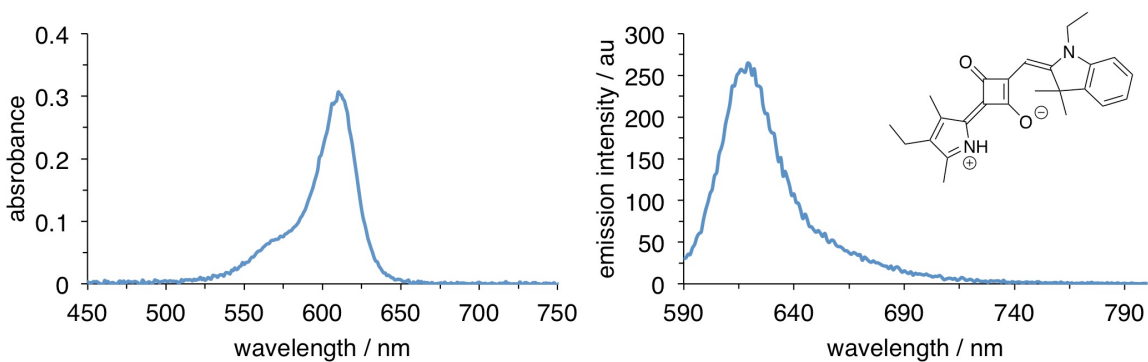

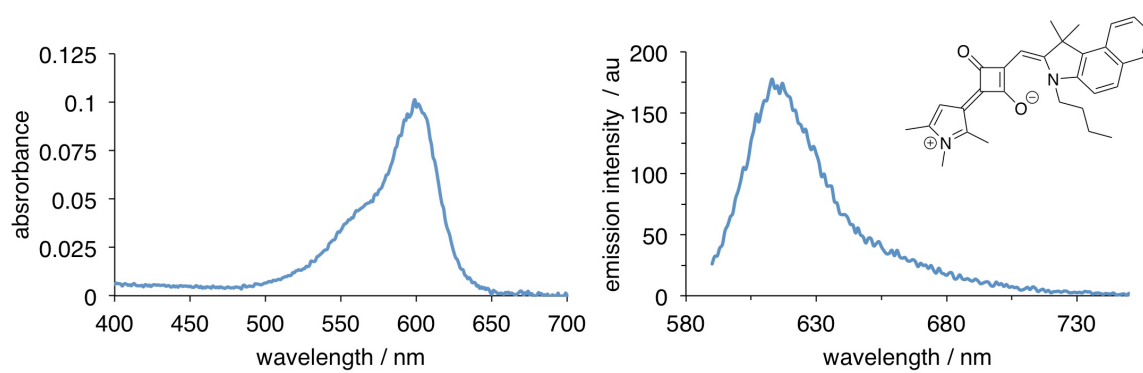

UV-Vis (left) and fluorescence emission (right) spectra of dye **18**.  
Conditions: [**18**] = 2  $\mu$ M,  $\lambda_{\text{ex}}$  = 580 nm.

**$^1\text{H}$  (top) and  $^{13}\text{C}$  (bottom) NMR SPECTRA  
OF COMPOUNDS  
1a, 4a, 6–18**

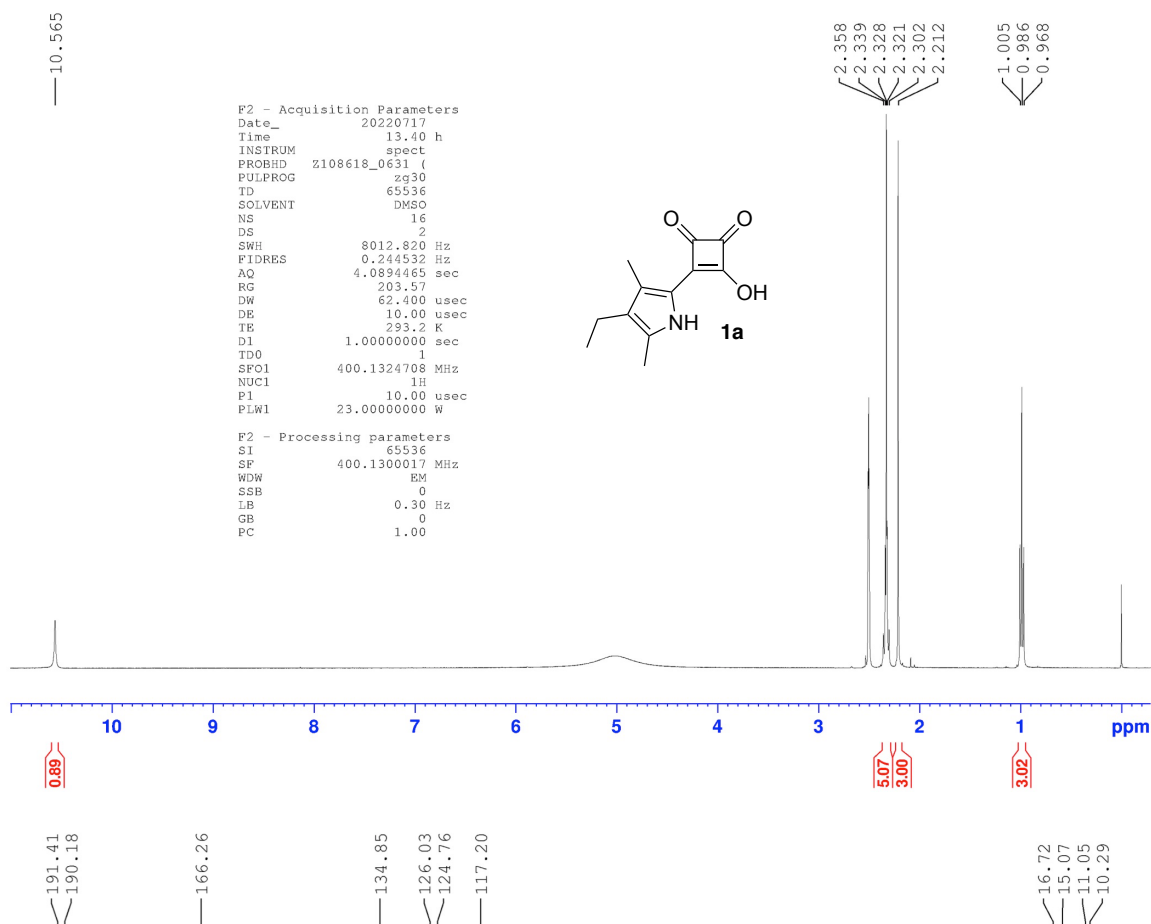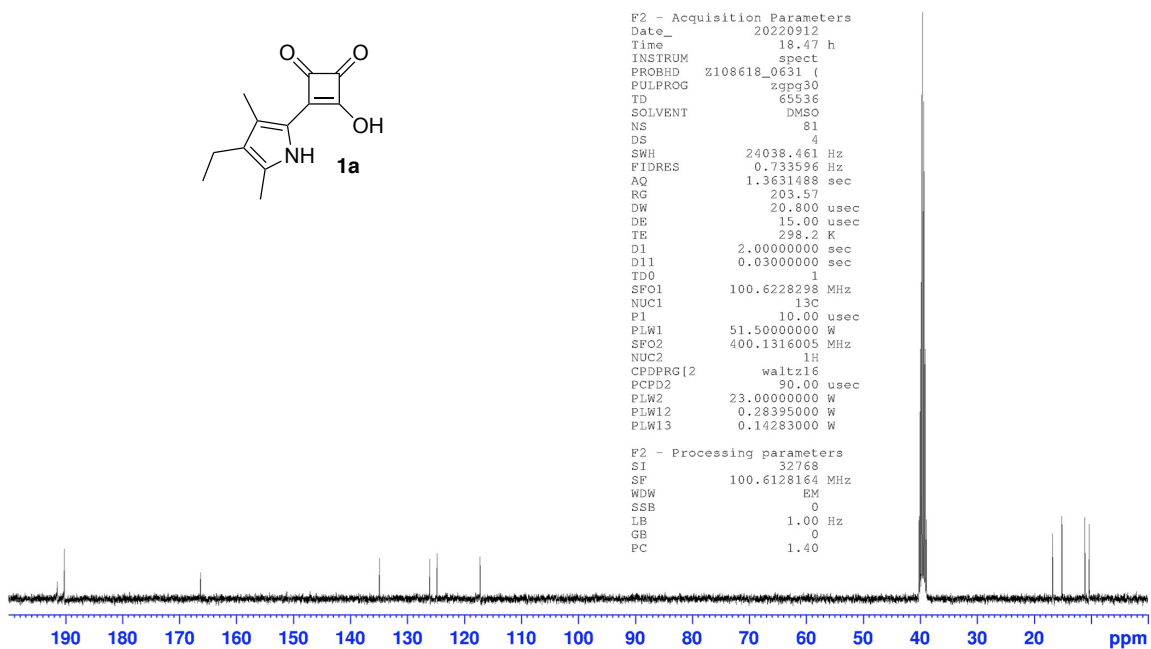

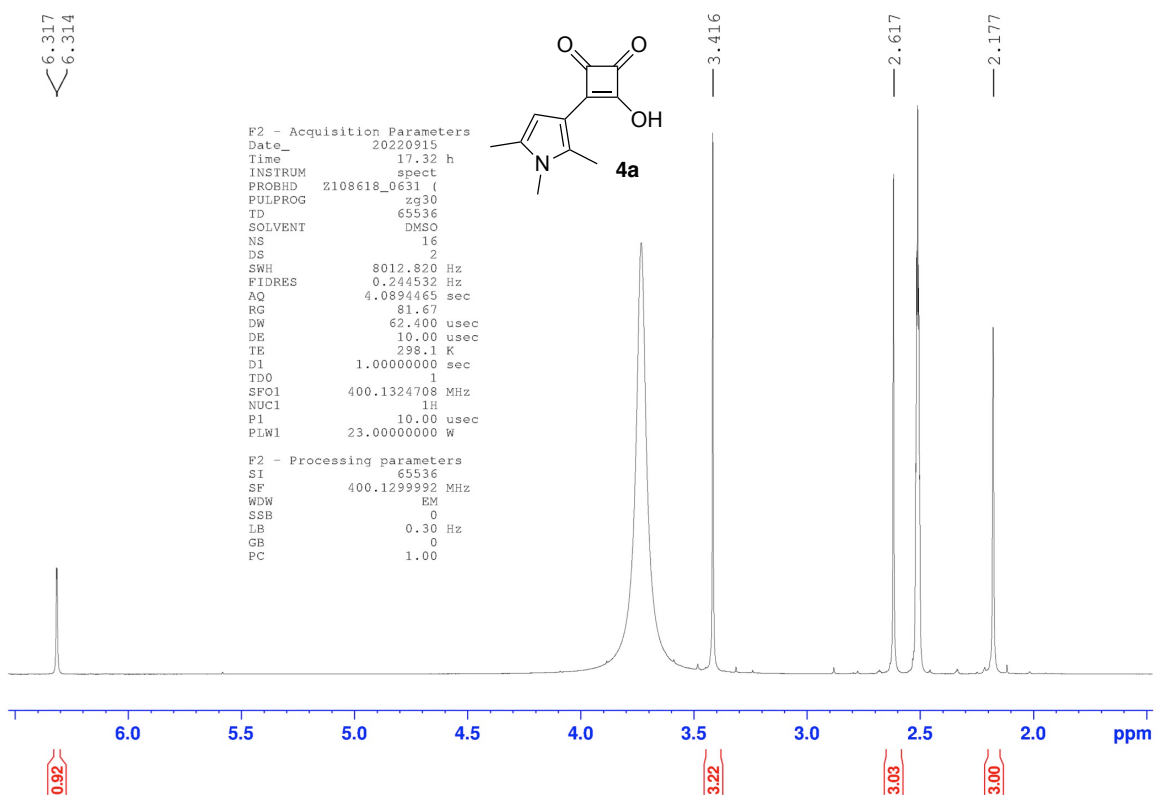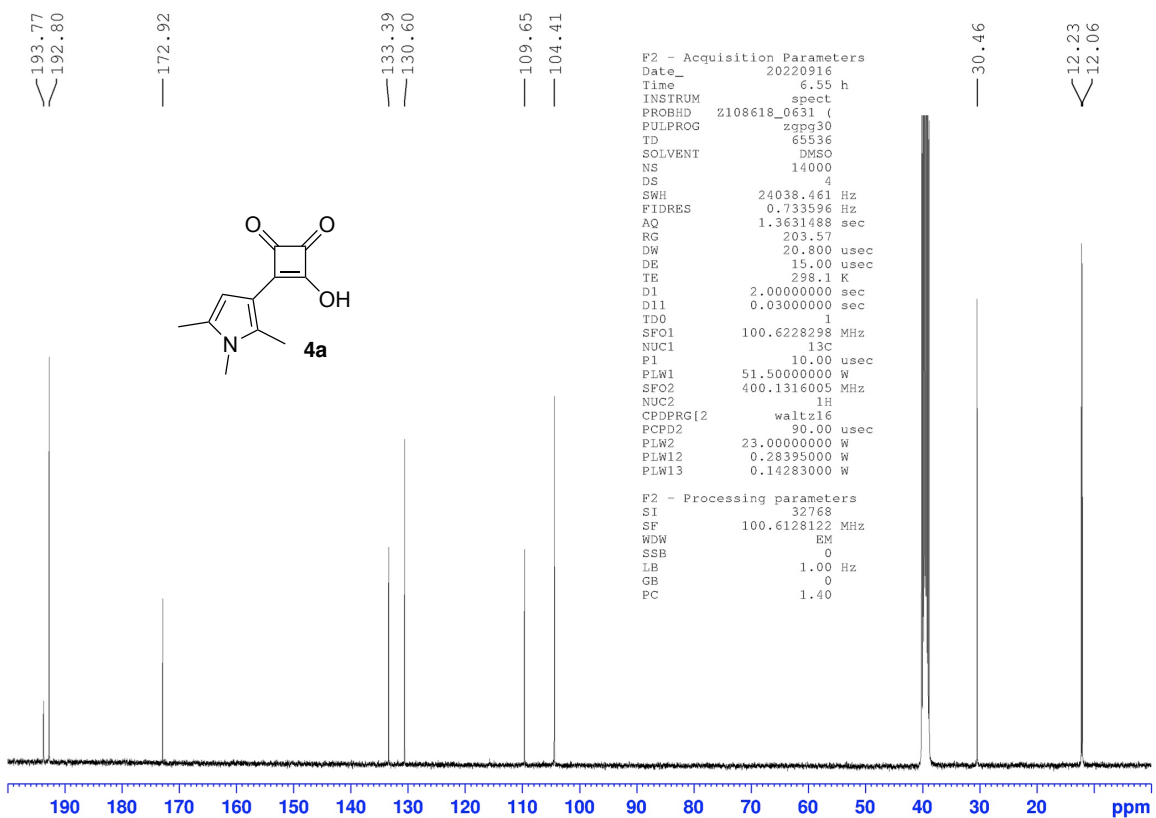

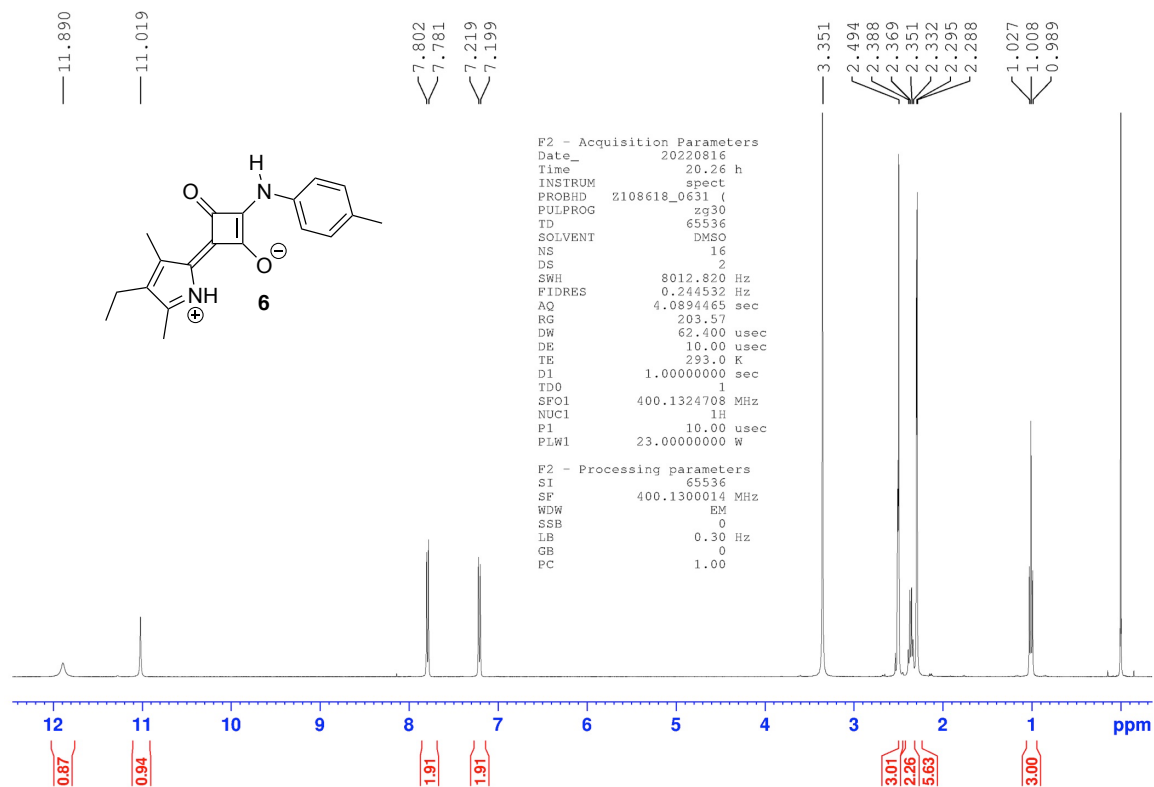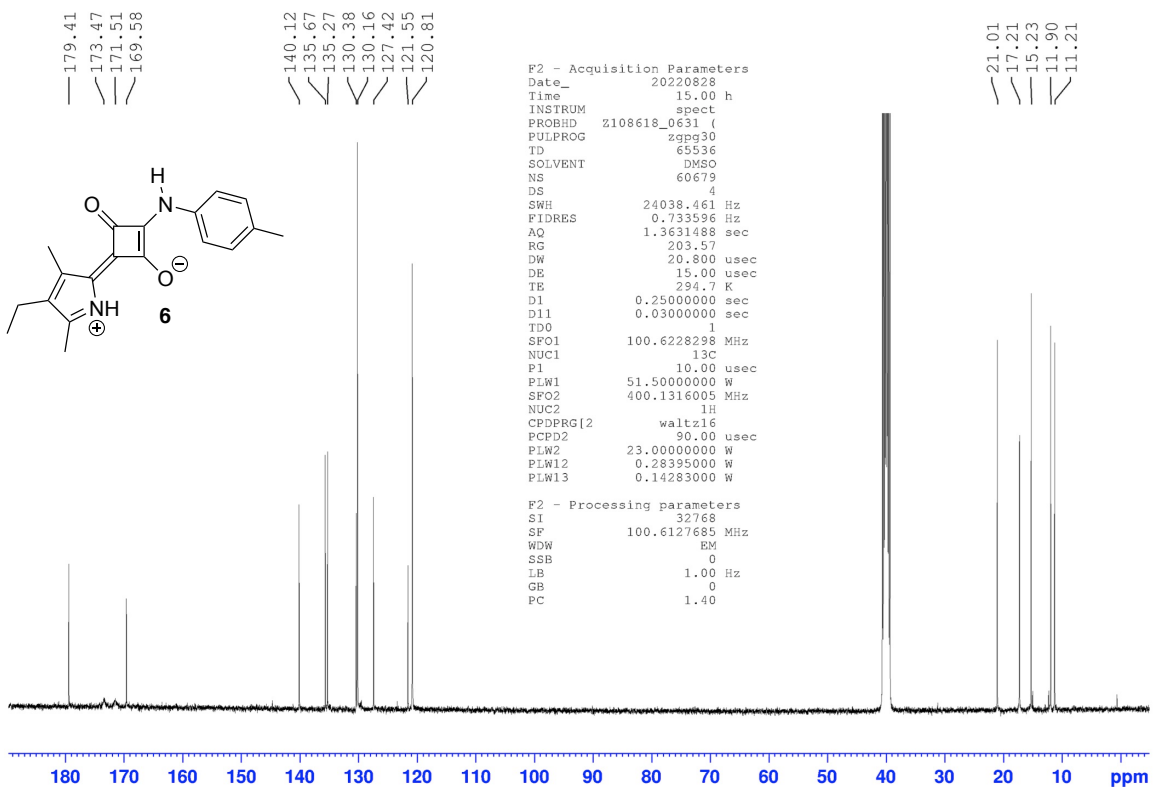

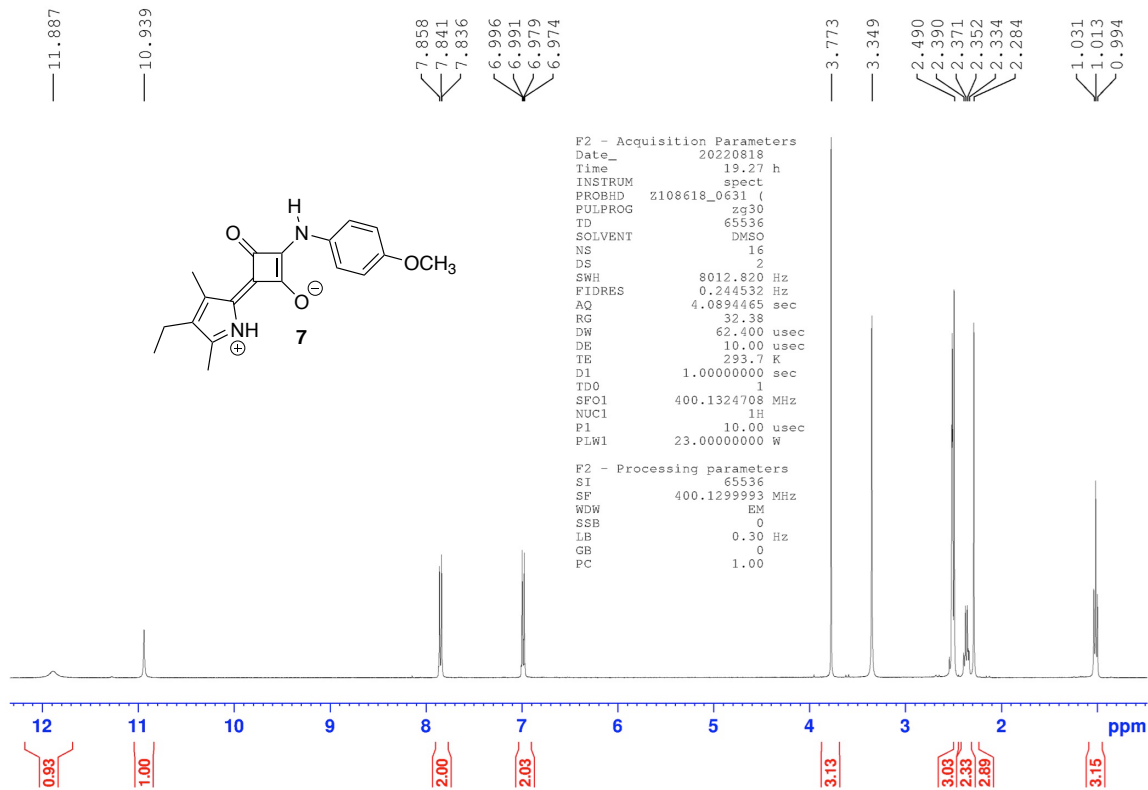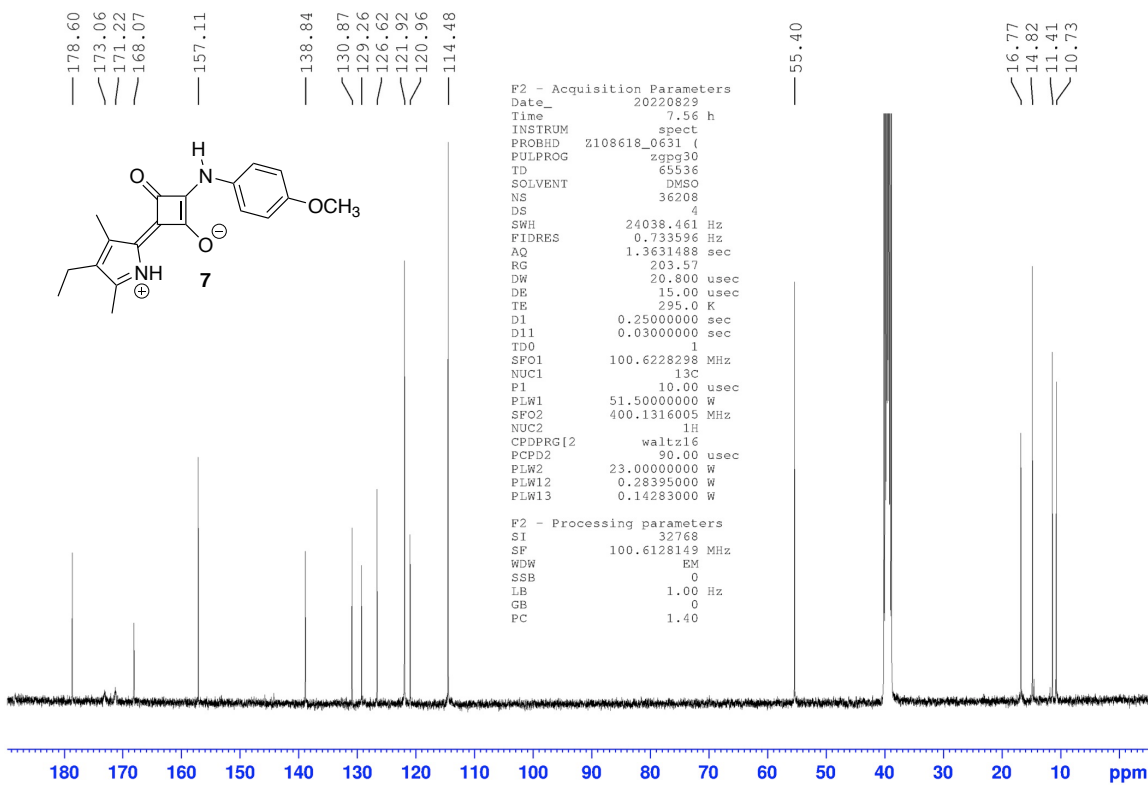

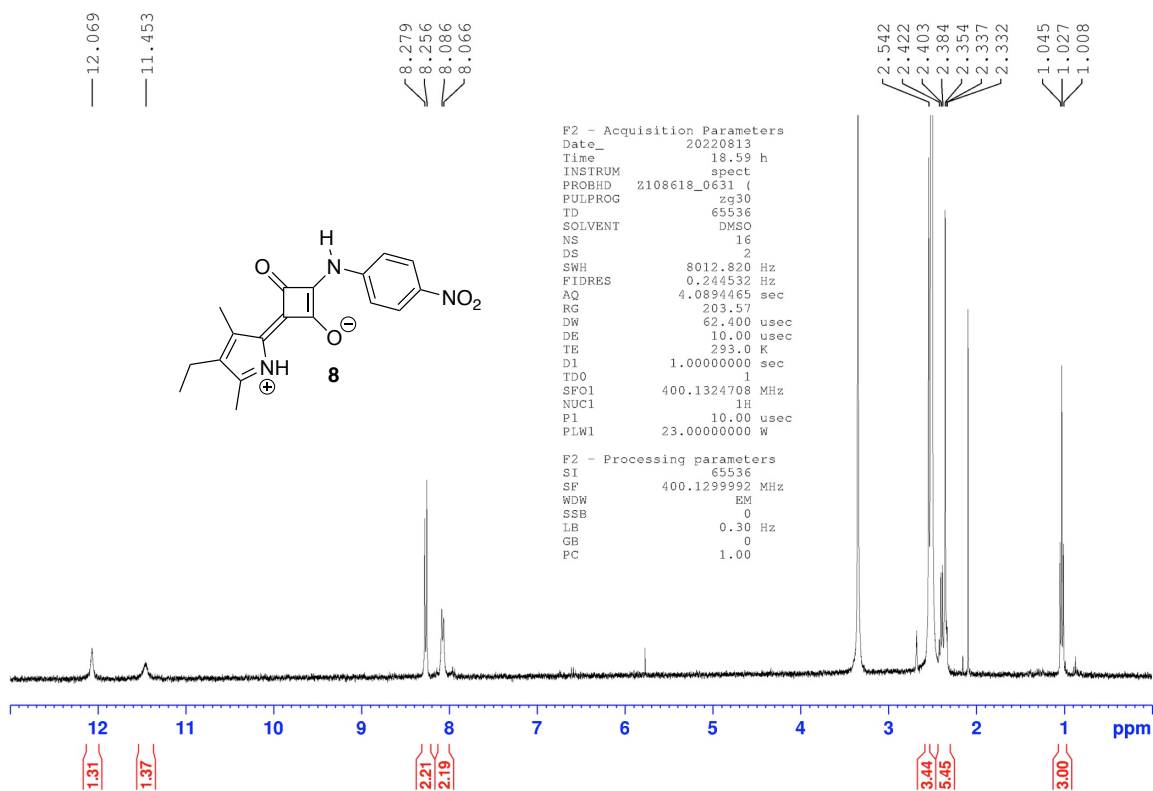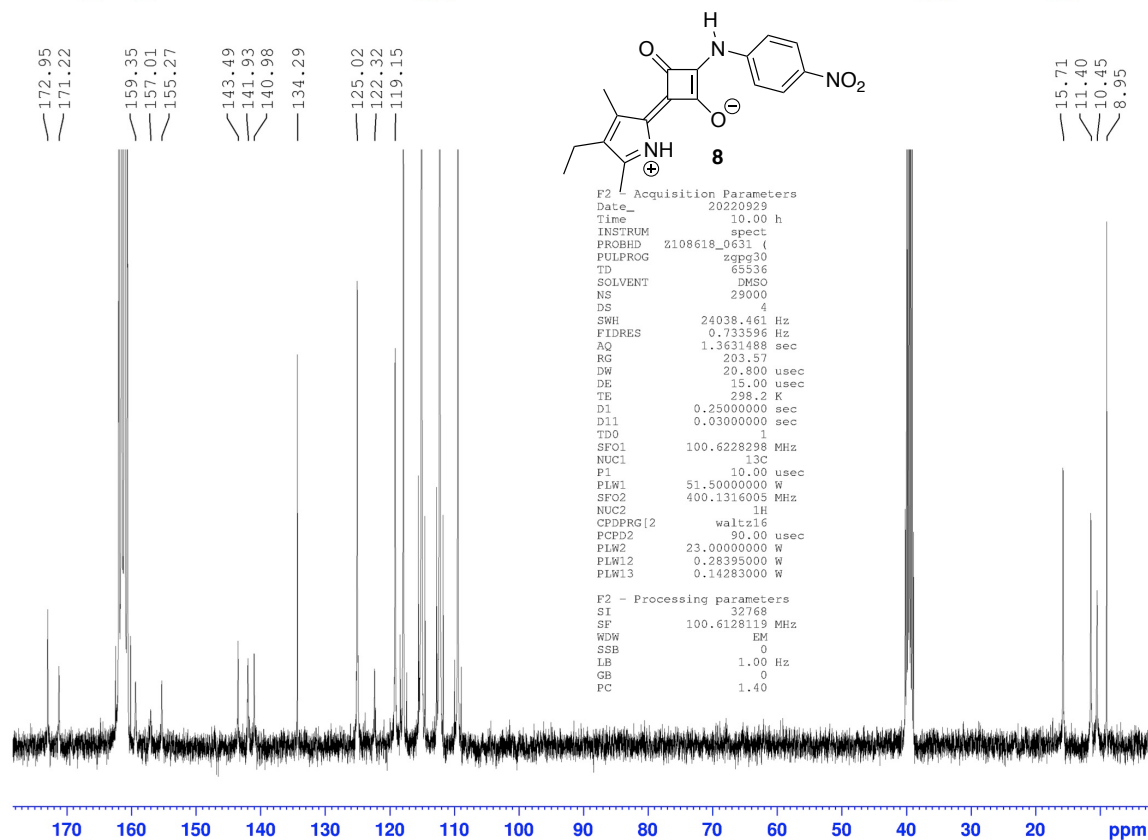



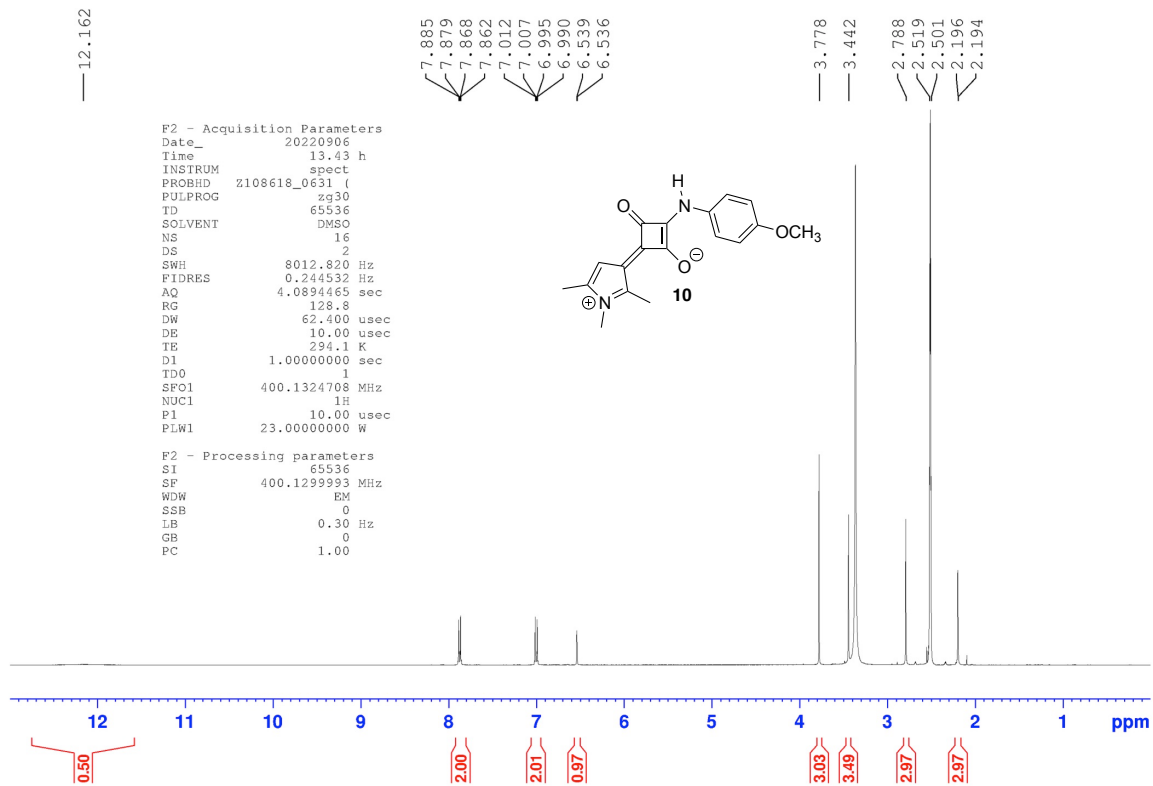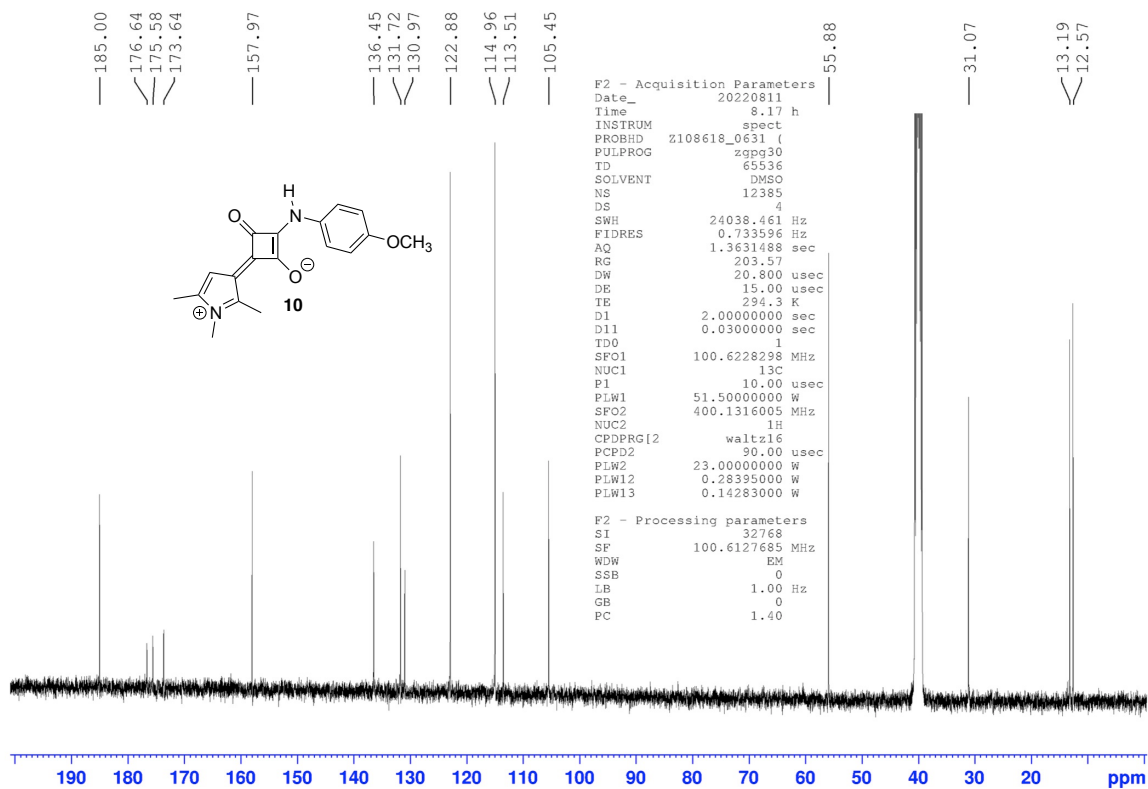

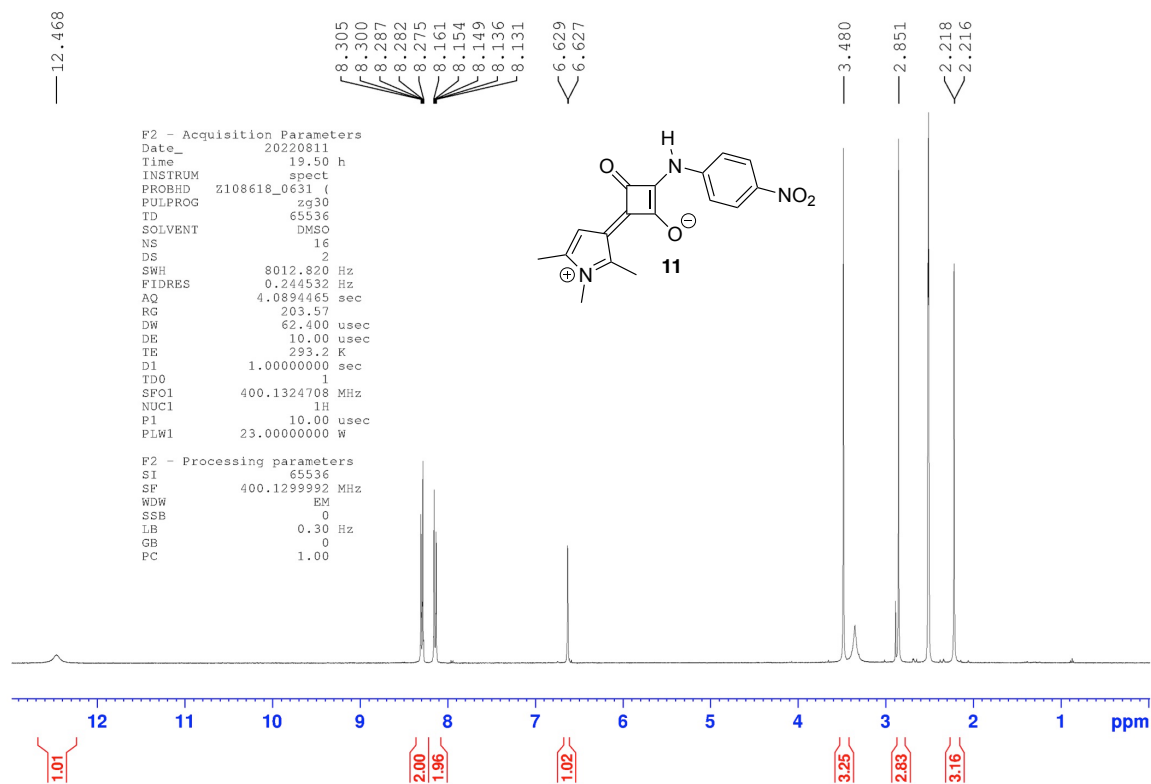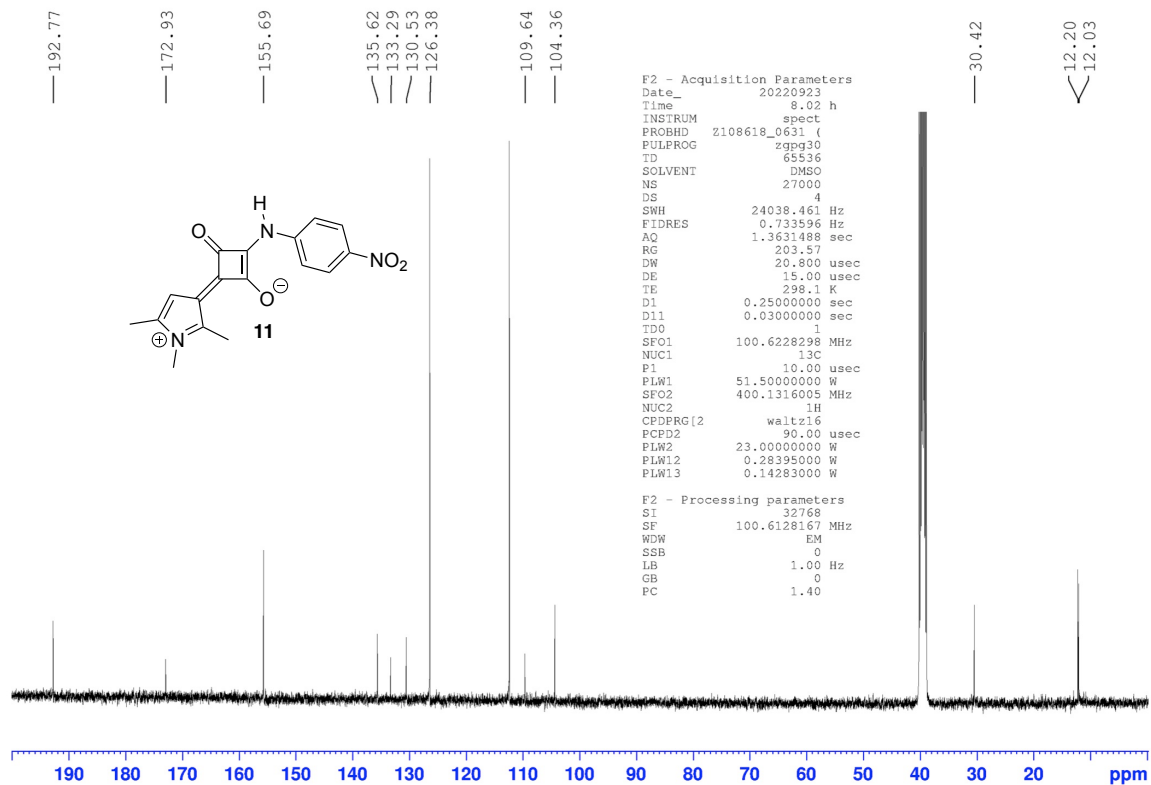

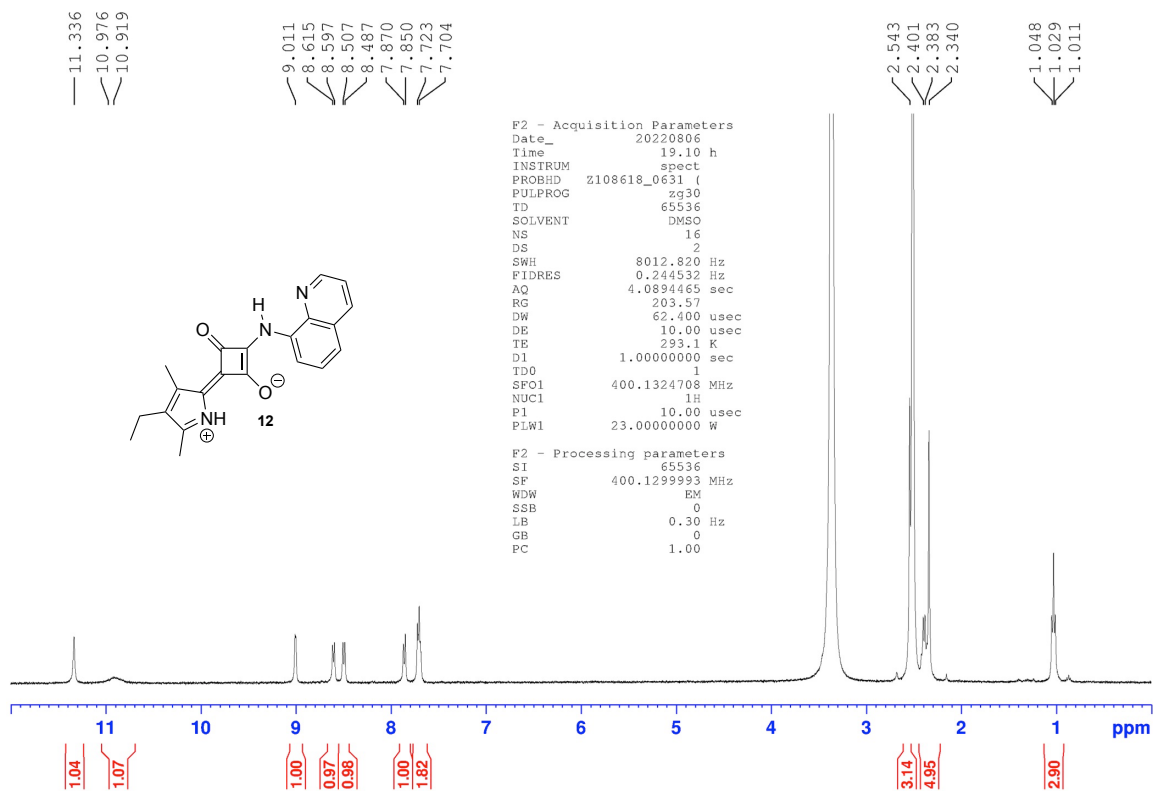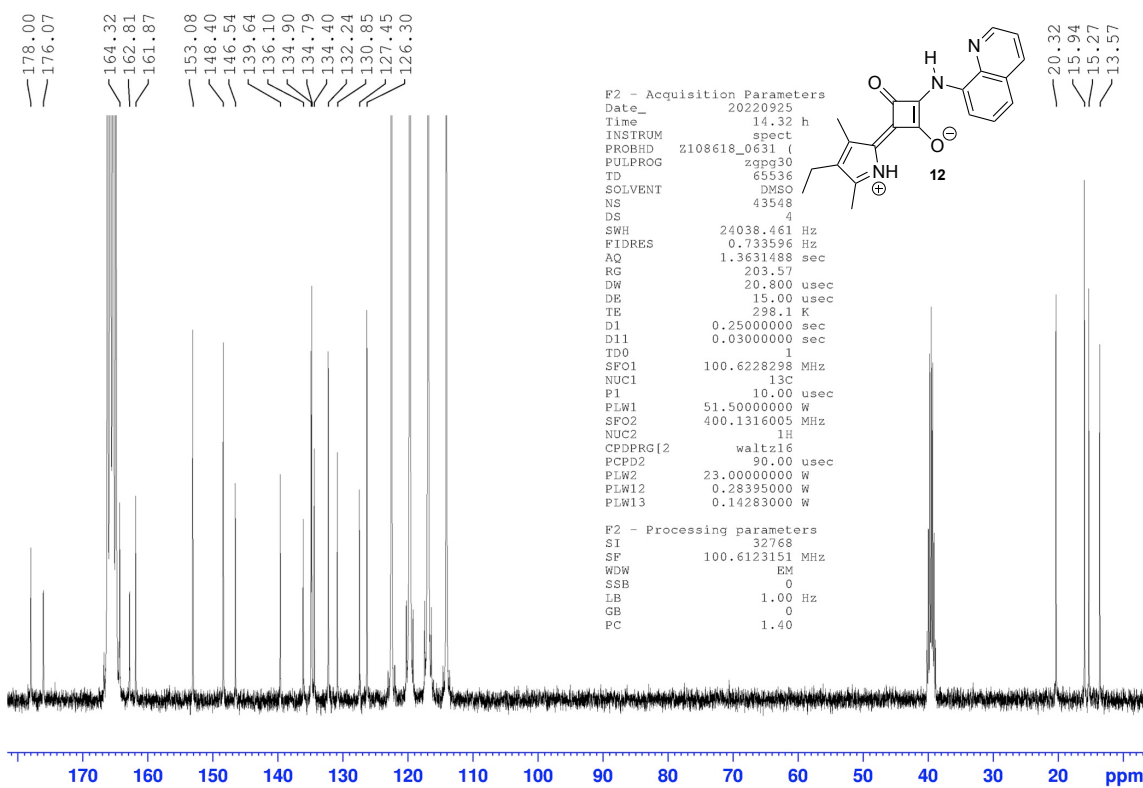

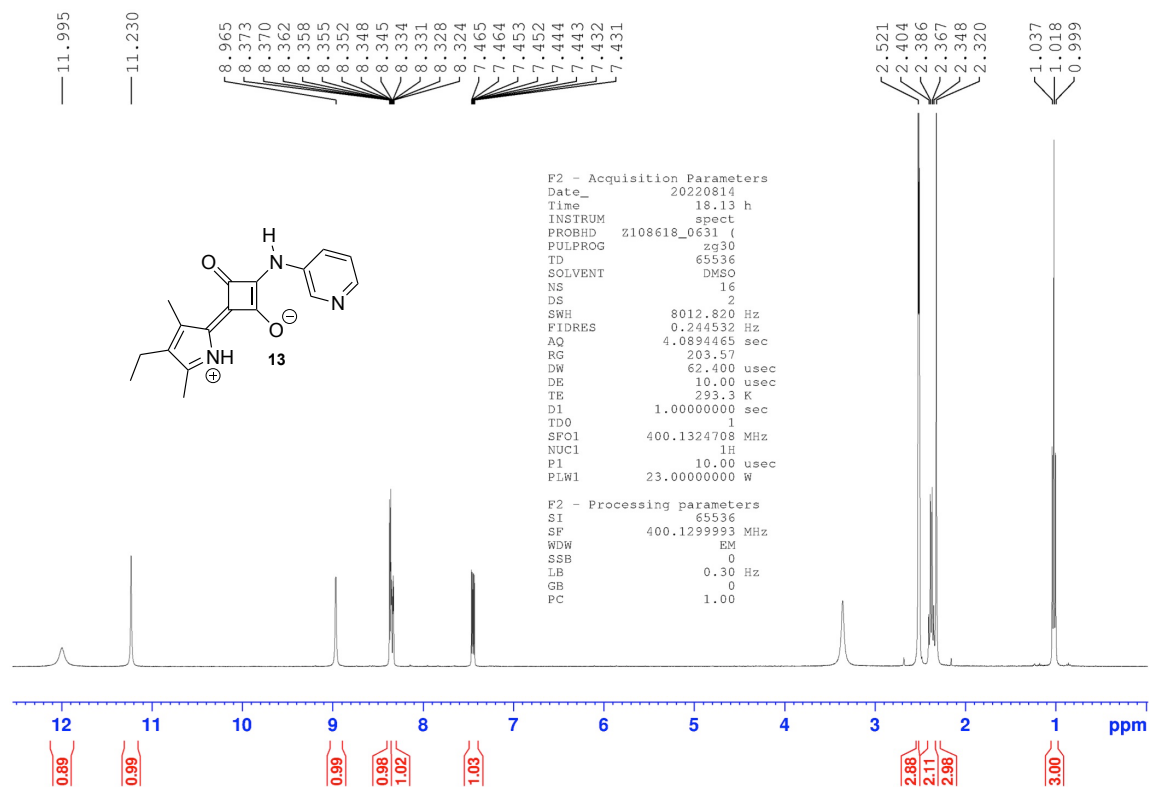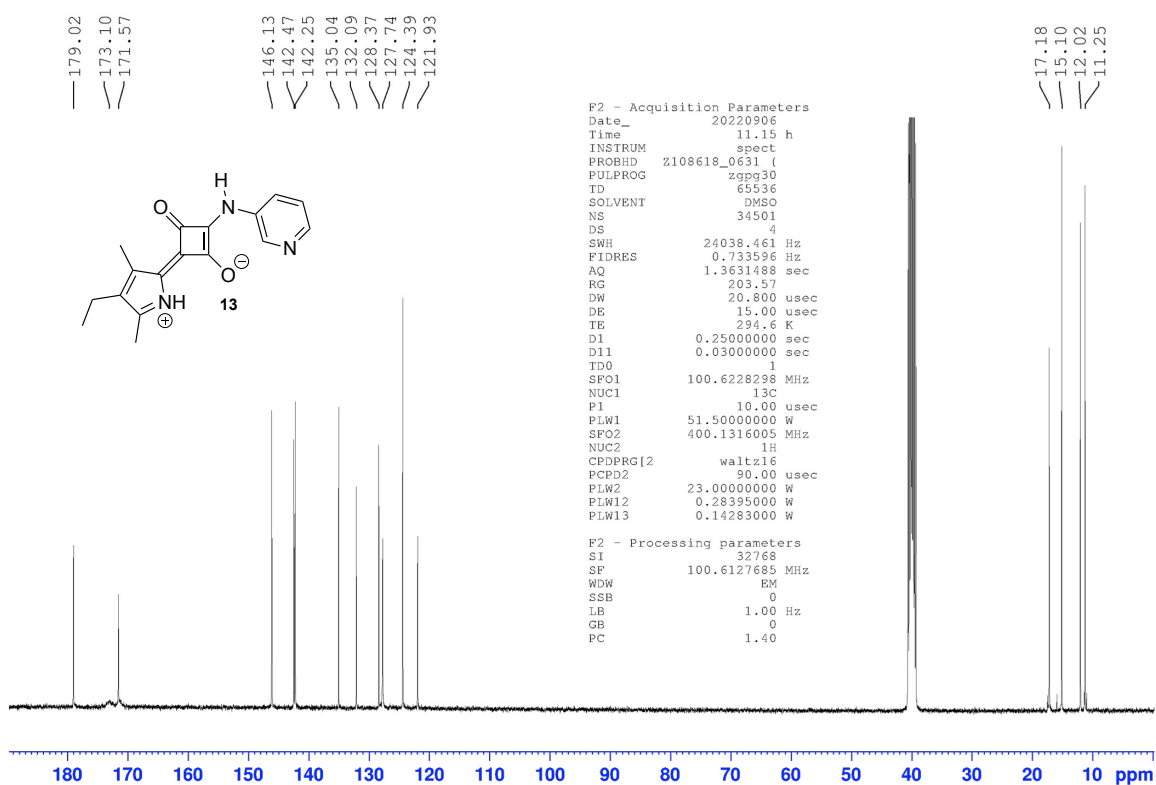

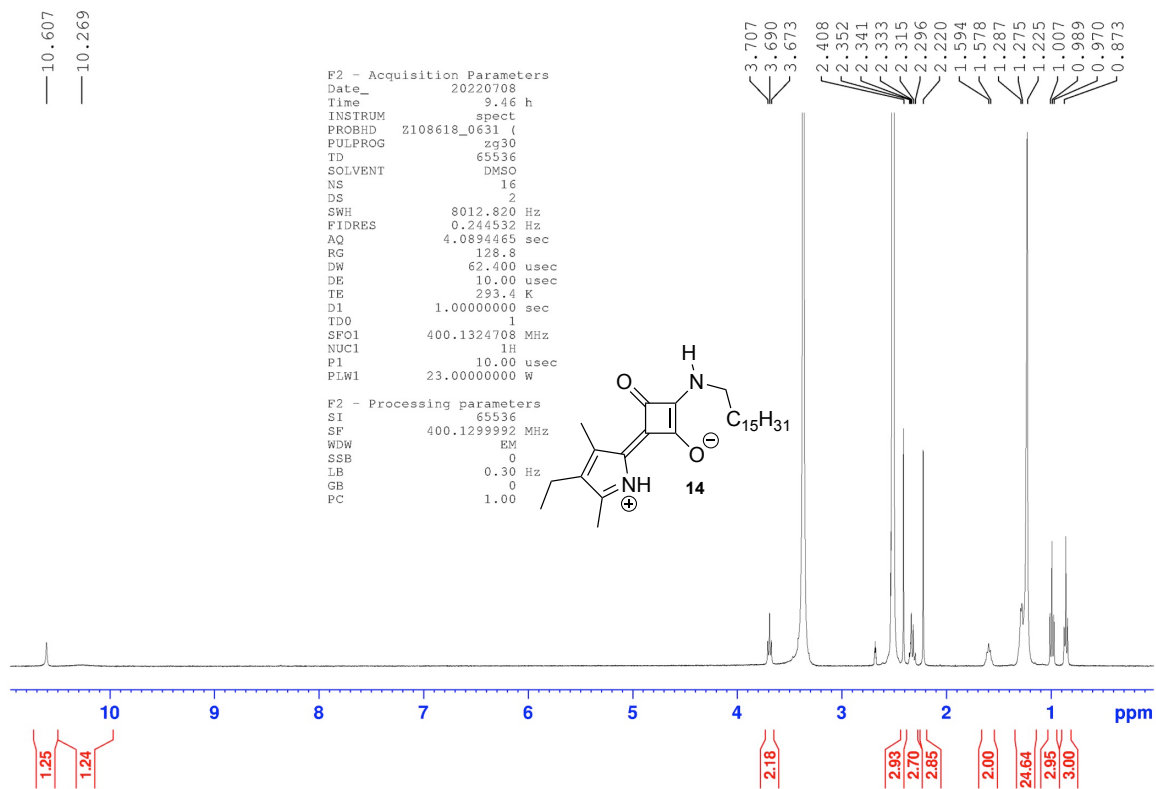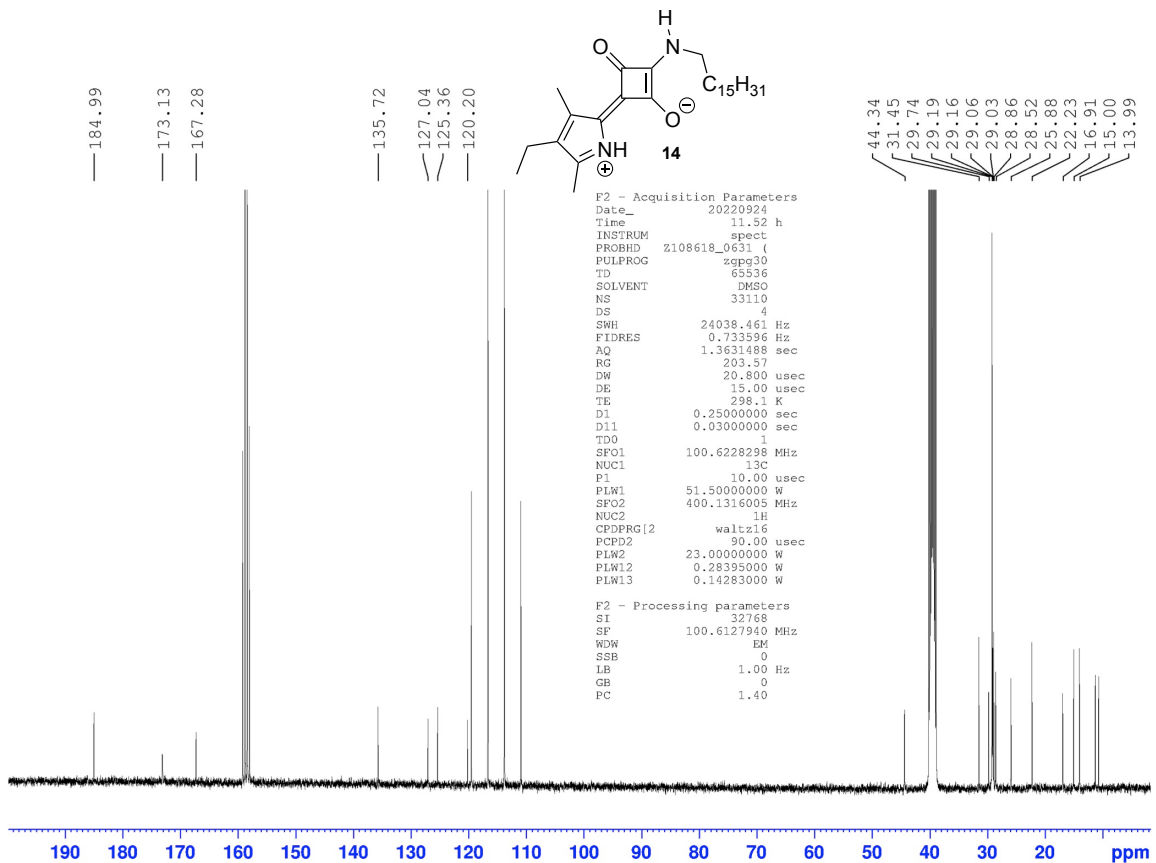

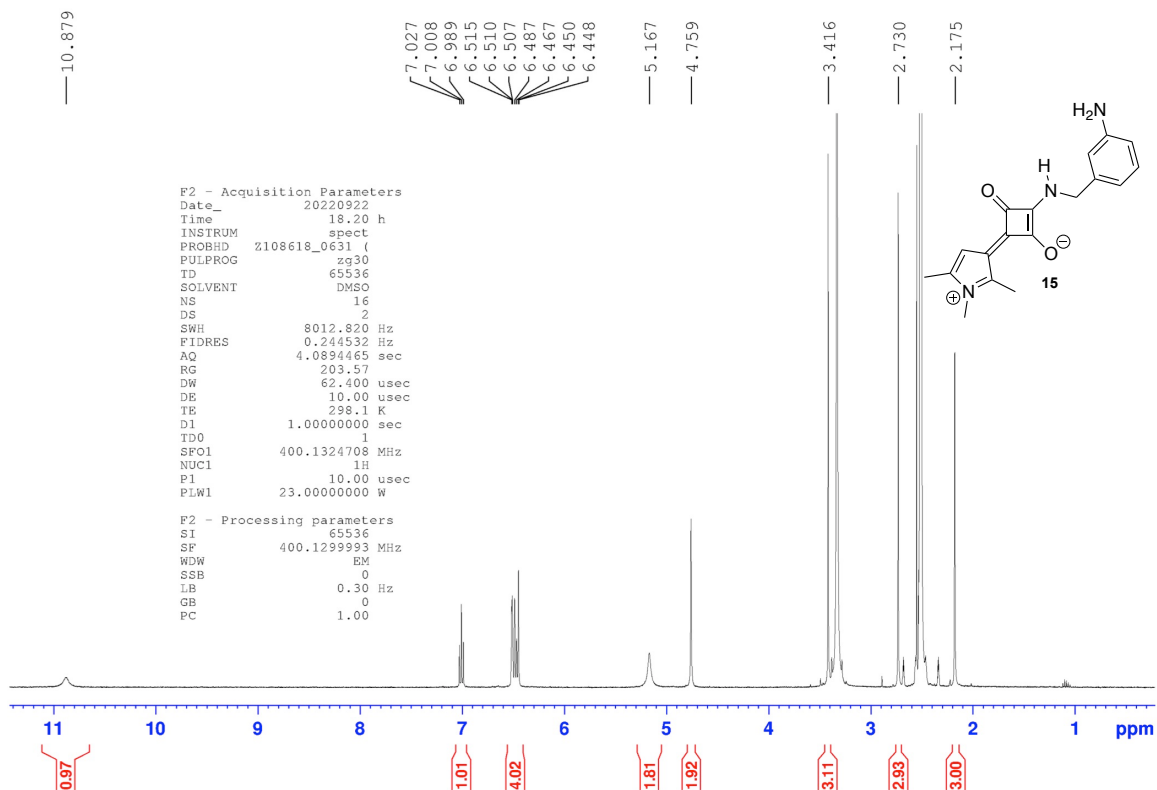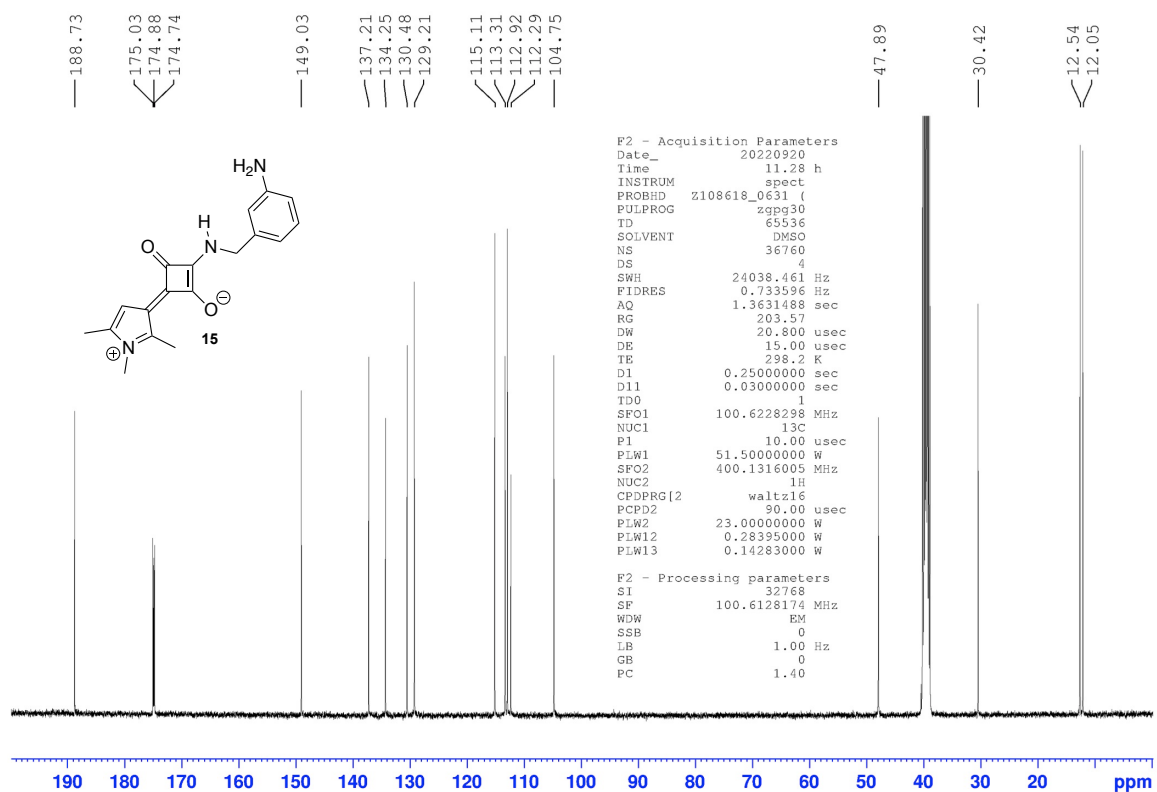

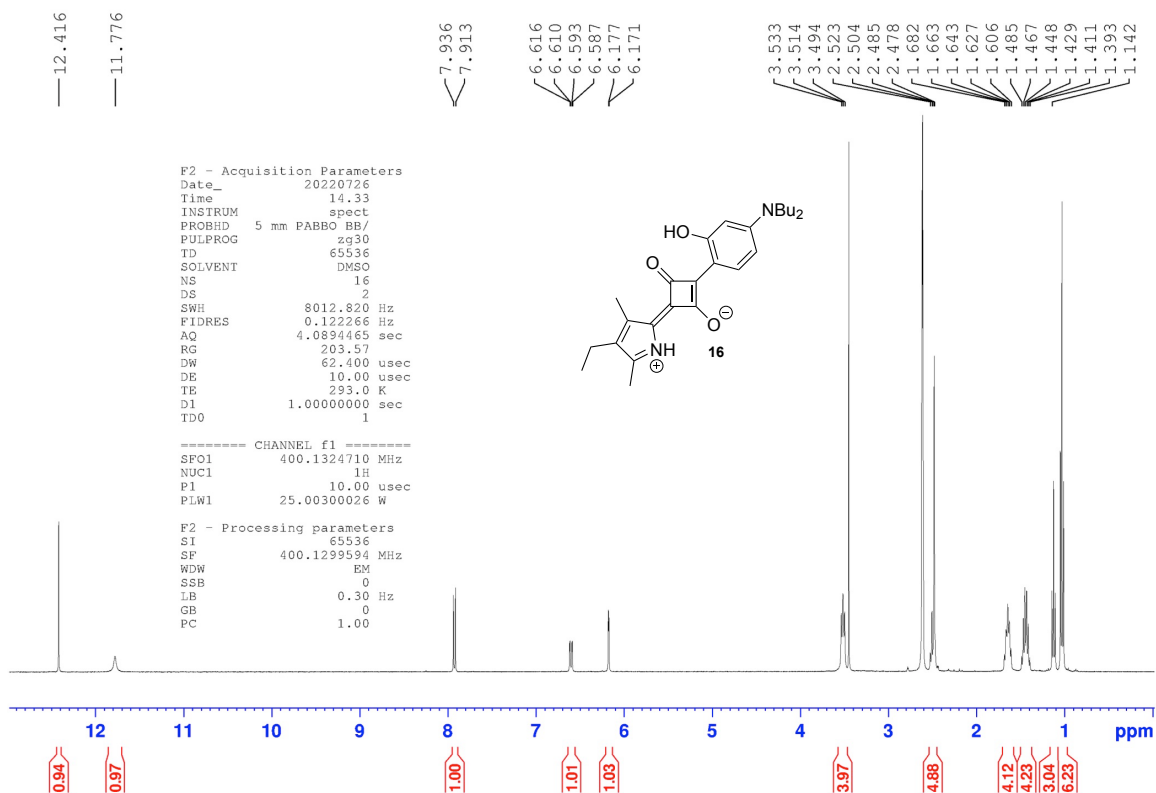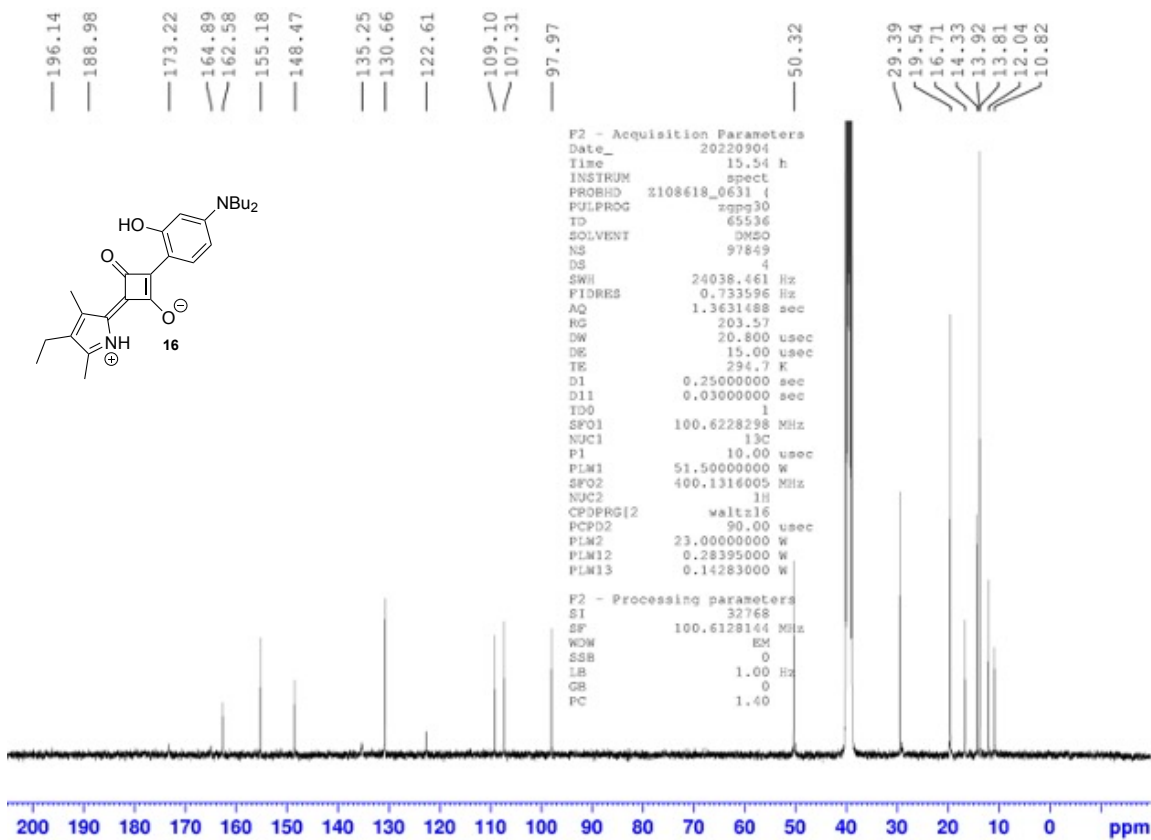

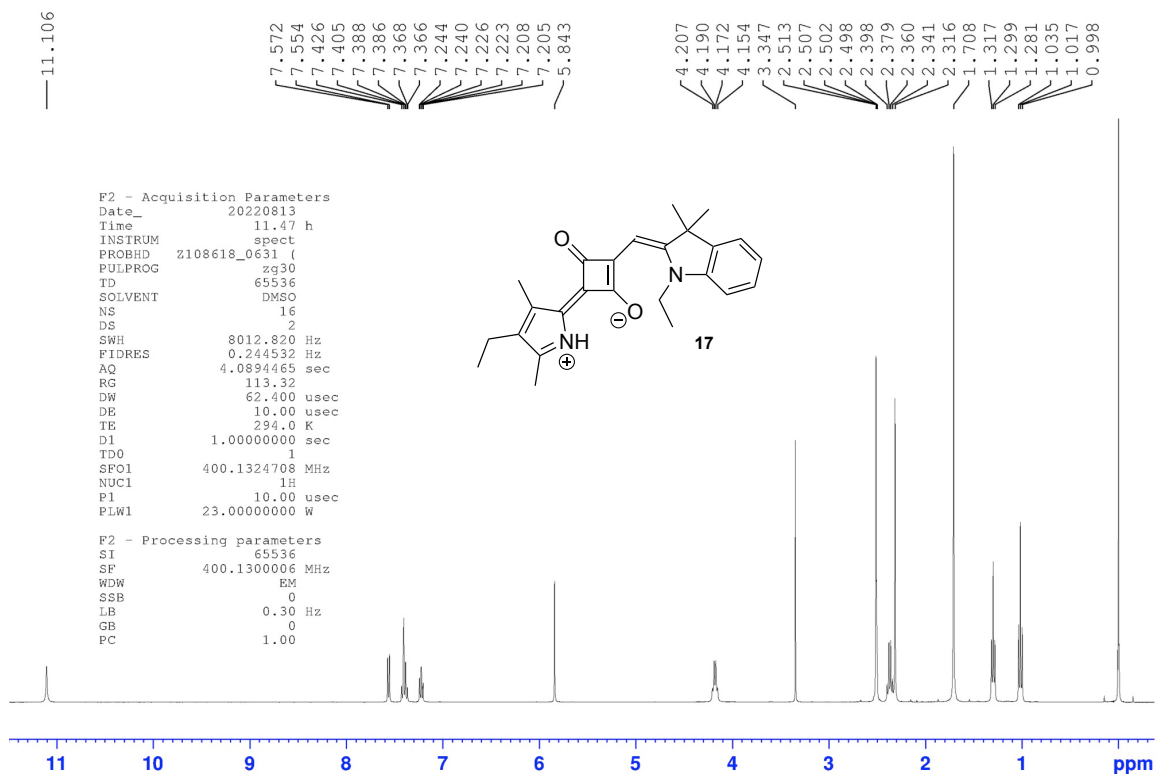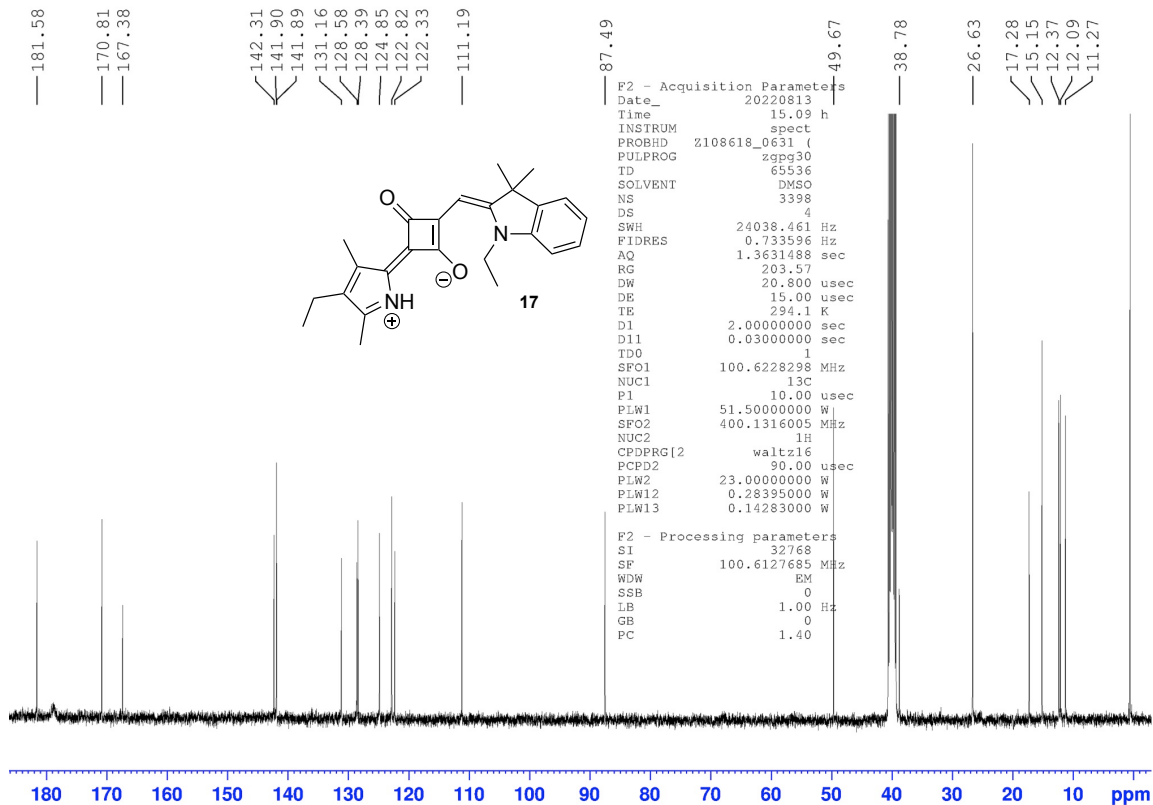



## REFERENCES

- S1. P. M. Kazmaier, G. K. Hamer, R. A. Burt, *Can. J. Chem.*, **1990**, 68, 530–536.
- S2. Y. Gu, X. Fei, Y. Liu, Y. Wang, X. Yang, *J. Luminescence*, **2013**, 134, 184–190.
- S3. D. Kiel, H. Hartmann, *Dyes Pigments*, **2001**, 49, 161–179.
- S4. K-Y. Law, F. C. Bailey, *Can. J. Chem.*, **1986**, 64, 2267–2273.
- S5. R. A. Sheldon, *ACS Sustainable Chem. Eng.*, **2018**, 6, 32–48.
- S6. D. J. C. Constable, A. D. Curzons, V. L. Cunningham, *Green Chem.*, **2002**, 4, 521–527.
